1 **Antiviral and Neuroprotective Abilities of Influenza Virus Infection in Tractable Brain**

2 **Organoids**

3 Xiaodong Zhang<sup>†</sup>, Haishuang Lin<sup>†</sup>, Liangzhen Dong<sup>†</sup>, Qing Xia<sup>\*</sup>

4 <sup>1</sup>Department of Chemical Biology, State Key Laboratory of Natural and Biomimetic Drugs, School of  
5 Pharmaceutical Sciences, Peking University, Beijing, China.

6 <sup>†</sup>These authors contributed equally to this work.

7 <sup>\*</sup>Corresponding: [xqing@hsc.pku.edu.cn](mailto:xqing@hsc.pku.edu.cn)

8

## 9 Abstract

10 Human pluripotent stem cell (hPSC)-derived brain organoids offer an unprecedented opportunity for various  
11 applications as an *in vitro* model, such as modeling virus infection and drug screening. In this study, we  
12 present an experimental brain organoid platform for modeling infection with multiple viruses (e.g., influenza  
13 virus or enterovirus). Brain organoids challenged by influenza viruses (H1N1-WSN and H3N2-HKT68) had  
14 decreased overall organoid size, similar to ZIKA virus infection, while enteroviruses (EV68 and EV71)  
15 infected brain organoids displayed the opposite result. Then, we studied the molecular events in WSN-infected  
16 organoids, and we found that WSN could widely infect multiple cell types, and preferentially infected MAP2+  
17 neurons compared to SOX2+ neural stem cells (NSCs) and GFAP+ astrocytes in brain organoids, and induced  
18 apoptosis of NSCs and neurons, but not astrocytes. The inflammatory responses in organoids observed to  
19 occur (Tumor necrosis factor alpha, interferon gamma, and interleukin 6) after WSN infection may further  
20 facilitate brain damage. Furthermore, transcriptional profiling revealed several upregulated genes (*CSAG3* and  
21 *OAS2*) and downregulated genes (*CDC20B*, *KCNJ13*, *OTX2-ASI*, *CROCC2*, and *F5*) after WSN infection for  
22 24 hpi and 96 hpi, implicating antiviral drugs development responses to WSN. Finally, we explored  
23 neurotrophic factors (e.g., BDNF, GDNF, and NT3) and PYC-12 as antiviral and neuroprotective reagents,  
24 which could significantly suppress virus infection, apoptosis, and inflammatory responses. Collectively, we  
25 established a tractable experimental model system to investigate the impact and mechanism of virus infection  
26 on human brain development, and provide a platform for rapidly screening therapeutic compounds, advancing  
27 the development of antiviral strategies.

28 **Keywords:** Influenza virus; Brain organoids; Human pluripotent stem cells; RNA transcriptomic profiling;

29 Antiviral screening.

30

## 31 **Introduction**

32 Central nervous system (CNS) infections are one of the most critical public health problems, and they lead to  
33 high morbidity and mortality every year, predominately in young children, the elderly, and the  
34 immunocompromised (Englund et al., 2011; Keipp Talbot and Falsey, 2010; Tregoning and Schwarze, 2010).  
35 CNS infections often lead to neurological sequelae, including epilepsy (Vehapoglu et al., 2015), and  
36 neurodevelopmental disorders, such as attention-deficit/hyperactivity disorder (ADHD) (Hoekstra, 2019) and  
37 autism spectrum disorder (ASD) (Sauer et al., 2021). Some known neurotropic viruses, such as measles virus  
38 (MV), herpes virus, and human immunodeficiency virus (HIV), can cause CNS infections (Koyuncu et al.,  
39 2013). Moreover, respiratory viruses including human respiratory syncytial virus (HRSV), influenza virus  
40 (IV), and coronavirus (Cov) have also become key factors responsible for CNS pathologies. In particular,  
41 COVID-19, which is caused by severe acute respiratory syndrome coronavirus 2 (SARS-CoV-2), has been  
42 characterized by respiratory failure in critically ill patients. The outbreak of COVID-19 has led to a pandemic,  
43 and serious and even fatal manifestations have been seen in the brain (Johansson et al., 2020). The annual  
44 pandemic of influenza A virus (IAV) has been shown to cause neurodegenerative diseases in clinical  
45 investigations (McGavern and Kang, 2011). IAV is often the causative agent of upper respiratory infection by  
46 recognizing sialic acids (SA) receptor in humans affecting people of all ages (Han et al., 2018). Although the  
47 influenza virus primarily infects the lungs, its neuropathological effects have also been shown in the clinic,  
48 including febrile seizures, myelitis, focal encephalitis, and even meningitis (Liang et al., 2018). However, the  
49 neuropathogenesis of these manifestations remains elusive, owing to the lack of physiological *in vitro* models

50 instead of patient-derived brain tissues. Therefore, there is an urgent need of *in vitro* physiological models of  
51 virus infection to identify the neuropathological mechanism in the brain.

52 Human pluripotent stem cell (hPSC)-derived organoids, which are an *in vitro* self-organizing and  
53 self-renewing three-dimensional tissue recapitulating the cytoarchitecture and functional components of  
54 human tissue, can be amendable to tissue development, disease modeling, drug screening, and therapeutic  
55 discovery (De Crignis et al., 2021; Qian et al., 2019). For example, Chen et al. (2021) generated  
56 serum-exposed brain organoids that were able to recapitulate Alzheimer's disease (AD)-like pathologies,  
57 providing a powerful platform for both mechanistic study and therapeutic development of AD treatments.

58 Dang et al. (2016) utilized human cerebral organoids to demonstrate that Zika virus (ZIKV) could decrease the  
59 number of neural progenitors through activation of the innate immune receptor TLR3, resulting in  
60 dysregulation of a network of genes involved in axon guidance, neurogenesis, differentiation, and apoptosis.

61 In addition, Clevers' group leveraged colorectal cancer (CRC) organoid lines to screen target-known inhibitors  
62 and chemotherapy drugs (Van De Wetering et al., 2015), and also used breast cancer organoid lines to screen  
63 EGFR/AKT/mTORC pathway inhibitors (Sachs et al., 2018). Currently, several organoids (e.g., lung, liver,  
64 gut, brain, and kidney) mimicking different tissues have been used to study the effects of SARS-CoV-2 on  
65 tissues *in vitro*, and tissue histopathology (Yu, 2021). The advantage of brain organoids over cell lines is that  
66 organoids model the three-dimensional organ to achieve multiple cellular interactions, and rather than animal  
67 models, the use of organoids enables studies of humans. Therefore, organoid technology offers a significant  
68 advantage in terms of mimicking *in vivo* tissue structures for testing antiviral compounds. To date, influenza  
69 virus-infected brain organoid use to identify neuropathogenesis or for drug screening has not been reported.

70 In this study, we evaluated the potential of brain organoids as *in vitro* infection models, and studied the  
71 neuropathogenesis of brain organoids challenged by WSN using hPSC-derived brain organoids. We found that  
72 WSN preferentially infected MAP2+ neurons in brain organoids, and further damaged the brain by eliciting  
73 inflammatory factor release (TNF- $\alpha$ , INF- $\gamma$ , and IL-6), as well as inducing the apoptosis of NSCs and neurons,  
74 but not astrocytes. Additionally, RNA transcriptomic profiles revealed new protein targets and noncoding  
75 RNAs for the development of antiviral strategies. Finally, we conducted an antiviral study and found that  
76 some specific neurotrophic factors (e.g., BDNF, GDNF, and NT3) and a potential antiviral drug candidate,  
77 PYC-12, could both significantly decrease virus replication to achieve antiviral and neuroprotective effects.  
78 Collectively, human organoids were shown to serve as an invaluable tool in the field of virus research to  
79 investigate the molecular mechanisms underlying virus replication and antiviral drug screening.

80

## 81 **Results**

### 82 *Generation and characterization of cerebral organoids from hPSCs*

83 To study the neuropathogenesis of virus-infected brain organoids instead of patient-derived brain tissue, we  
84 first generated human pluripotent stem cell (hPSC)-derived brain organoids as previously described (Lancaster  
85 and Knoblich, 2014), with slight modifications. Briefly, hPSCs were first dissociated into single cells,  
86 followed by centrifugation at 100 g for 3 minutes. hPSCs were allowed to form embryoid bodies (EBs) in  
87 Essential 8 medium containing 10  $\mu$ M ROCK inhibitor for 4 days, incubated in neural induction medium to  
88 develop neuroectoderm, and then transferred to a Matrigel droplet. Finally, these Matrigel droplet  
89 encapsulated tissues were transferred to a spinning bioreactor, which promoted nutrient and oxygen exchange  
90 to further develop into brain organoids (**Fig. 1A**). The representative bright field images display the entire  
91 development of brain organoids at indicated time points (**Fig. 1B**). In the process of organoid development,  
92 the diameter ( $\mu$ m) of organoids increased, while the area ( $\mu$ m<sup>2</sup>) increased in early stages and decreased  
93 obviously in later stages (**Fig. 1C, D**). Next, we performed immunostaining of brain organoids at days 15, 30,  
94 60, and 120 with the neural stem cell marker-SOX2 and the neuron marker-MAP2 (**Fig. 1E, F**). Statistical  
95 analysis showed that the majority of the cells on day 15 and day 30 organoids were neural stem cells (SOX2+),  
96 while the majority of the cells on day 60 and day 120 organoids were neurons (MAP2+) (**Fig. 1G**). Finally,  
97 quantitative real-time polymerase chain reaction (RT-PCR) confirmed the specific markers in the entire  
98 process of brain organoid development, including the hPSC markers, *OCT4* and *NANOG*; the NSC marker,  
99 *PAX6*; the forebrain markers, *FOXG1* and *SIX3*; the hindbrain markers, *KROX20* and *ISL1*; the neuron marker,  
100 *TUJ1*; and the deep-layer cortical neuron markers, *CTIP2* and *TBR1* (**Fig. 1H**). In summary, these results

01 suggested that there was robust differentiation of brain organoids and following applications of virus infection  
02 model.

### 03 *Brain organoid as an in vitro model for distinct virus infection*

04 To model the effects of virus infection on early human brain development, we used hPSC-derived brain  
05 organoids at day 40 of differentiation. We challenged these day 40 brain organoids with a diverse panel of  
06 viruses, including influenza viruses (H1N1-WSN and H3N2-HKT68), enteroviruses (EV68 and EV71) and  
07 severe fever with thrombocytopenia syndrome virus (SFTSV) at indicated timepoints, and identified the  
08 optimal doses for virus infection. These were  $1 \times 10^6$  pfu for WSN,  $5 \times 10^6$  pfu for H3N2,  $8 \times 10^4$  pfu for EV68,  
09 and  $4 \times 10^6$  pfu for EV71 (**Fig. 2A**). The representative bright field images show a decrease in overall organoid  
10 size in the influenza virus infection group at indicated virus doses (**Fig. 2B, D**), which was similar to Zika  
11 virus infection but not as severe (Tang et al., 2016). Statistical analysis of diameters ( $\mu\text{m}$ ) and areas ( $\mu\text{m}^2$ ) for  
12 influenza virus-infected organoids showed a dose-dependent size decrease (**Fig. 2C, E**). Surprisingly, when  
13 we challenged day 40 organoids with the other two H1N1 subtypes, PR8 and CA07, we observed a slight  
14 increase of organoid size at indicated virus doses through representative bright field images and statistical  
15 analysis of diameters ( $\mu\text{m}$ ) and areas ( $\mu\text{m}^2$ ) (**Fig. S1**). Meanwhile, enteroviruses (EV68 and EV71)-infected  
16 brain organoids resulted in a significant increase of overall organoid size at indicated virus doses through  
17 bright field images and statistical analysis of their diameters and areas (**Fig. 2F-I**). However, SFTSV-infected  
18 brain organoids showed no obvious changes in overall organoid size (**Fig. 2J, K**). Therefore, the  
19 morphological changes of organoids challenged by multiple viruses may be different due to different  
20 mechanisms.



21 Next, to better understand the infection mechanism of brain organoids with virus, we primarily focused on the  
22 study of WSN infected brain organoids. These brain organoids were generated as mentioned previously and  
23 infected on days 30, 60, and 250 (**Fig. 3A**). Before WSN infection of organoids, we first confirmed that ~20%  
24 NESTIN+ NSCs derived from hPSCs and ~10% GFAP+ astrocyte could be infected by WSN at the cellular  
25 level (**Fig. 3B**). The advantage of brain organoids over cell lines is that organoids model a three-dimensional  
26 organ to achieve multiple cellular interactions, and the advantage of organoids over animal models is that  
27 organoids enable studies of humans. Immunostaining of day 30 and day 60 brain organoids with SOX2+  
28 NSCs and MAP2+ neurons showed a time-dependent increase of NP+ cells compared to mock infection,  
29 especially for MAP2+ neurons (**Fig. 3C, D**). The statistical percentage of NP+ cells demonstrated that WSN  
30 was more likely to infect MAP2+ neurons (~60%) at 4 dpi, while only ~10% – 20% of NSCs were infected at  
31 1 dpi and 4 dpi, respectively (**Fig. 3E, H**). The intracellular and extracellular virus titers showed a  
32 time-dependent increase after WNS infection in day 30 or day 60 organoids (**Fig. 3F, G, I, J**). To further  
33 investigate long-term infection, we cultured brain organoids for 250 days. Immunostaining of day 250  
34 organoids revealed that ~30% of SOX2+ NSCs, ~60% of MAP2+ neurons, and ~10% of GFAP+ astrocytes  
35 were infected by WSN (**Fig. 3K, L**). The extracellular virus titers showed a time-dependent increase in WSN  
36 infected day 250 organoids (**Fig. 3M**). These results suggested that MAP2+ neurons were more susceptible to  
37 WSN infection compared to NSCs or astrocytes in brain organoids (**Fig. 3N**).

### 38 *Transcriptomic profiling of WSN infected organoids*

39 To investigate the underlying molecular mechanisms at the gene level, we performed transcriptomic profiling  
40 of WSN-infected organoids at 1 dpi and 4 dpi compared to mock-infected organoids. Hierarchical clustering

41 analysis showed the significant differences in gene expression between 1 dpi and 4 dpi organoids compared to  
42 mock-infected organoids (**Fig. 4A**). A Venn diagram shows that there were more gene alterations at 4 dpi  
43 compared to 1 dpi, and 266 genes were upregulated while 117 genes were downregulated in both groups (**Fig.**  
44 **4B**). GO terms were mainly enriched in the regulation of cellular metabolic process, negative regulation of  
45 developmental process, and innate immune response at 1 dpi, while they were mainly enriched in negative  
46 regulation of nervous system development, and neuron differentiation at 4 dpi (**Fig. 4C**). KEGG signaling  
47 pathway terms were enriched in virus infection pathways at 1 dpi, while they were enriched in MAPK  
48 signaling pathway and glycolysis/gluconeogenesis at 4 dpi (**Fig. S2A**). Next, we performed a detailed gene  
49 expression analysis at 1 dpi and 4 dpi. In the top 10 of upregulated and downregulated genes, *FABP1*, *CDX2*,  
50 *FGG*, *ISX*, *SI*, *GSTA1*, *GBP1P1*, *CXCL10*, *KRT20*, and *CXCL11* were significantly upregulated, while  
51 *MCIDAS*, *MFRP*, *CCKAR*, *CDC20B*, *AL355812.1*, *SLC39A12*, *CCNO*, *ABCA4*, *KCNJ13*, and *OTX2-AS1* were  
52 significantly downregulated in the 1 dpi group. *CCL7*, *HIST1H3PS1*, *RN7SL472P*, *NCOA4P2*, *WDR95P*, *IL6*,  
53 *ZSCAN4*, *AP001331.1*, *AC108134.2*, and *GBP1P1* were significantly upregulated, while *DAPL1*, *MIR217HG*,  
54 *SIX6*, *AL451127.1*, *TFAP2D*, *AC016044.1*, *SIX3OS1\_2*, *VSX1*, *CLRN1*, and *AL138826.1* were significantly  
55 downregulated in the 4 dpi group (**Fig. 4D**). *GBP1P1*, *CXCL10*, *CXCL11*, *CCL7*, *CSAG3*, *OAS2*, and  
56 *NCOA4P2* were upregulated and *CDC20B*, *AL355812.1*, *KCNJ13*, *OTX2-AS1*, *CROCC2*, and *F5* were  
57 downregulated in both groups (**Fig. 4E**). In most cells, interferon (IFN) response is a major first line of  
58 defense against viral infection. Viral infection triggers the production of IFNs, which then bind to ubiquitously  
59 expressed receptors on nearby cells and induce a powerful transcriptional program comprised hundreds of  
60 antiviral IFN-stimulated genes (ISGs) (Malterer et al., 2014). In this study, hierarchical clustering analysis

61 identified a set of ISGs (e.g., *IFITM1/2/3*, *BST2*, and *SLC16A1*) that were highly induced in the early stages of  
62 WSN infection (1 dpi), while significantly decreased in late stages of infection (4 dpi) (**Fig. 4F**). This  
63 indicated that ISGs played the crucial role against viral invasion during early infection. We also analyzed  
64 some DEGs of transcription factors (**Fig. S2B**), inflammatory factors (**Fig. S2C**), and metabolic genes (**Fig.**  
65 **S2D**) that were associated with virus infection. We found that they showed significant changes between 1 dpi  
66 and 4 dpi compared to mock infection. Moreover, a protein-protein interaction network of WSN infected brain  
67 organoids at 4 dpi was more robust than at 1 dpi (**Fig. S2E**). In addition, WSN-infected organoids caused not  
68 only protein gene changes, but also some noncoding RNA levels, such as *BISPR* and *MIR4435-2HG* (**Fig. S3**).  
69 Collectively, these results suggested that WSN infection of brain organoids resulted in considerable gene  
70 alterations, and implicating these genes for the development of new antiviral strategies.

#### 71 *WNS impairs brain organoid growth through inducing apoptosis and inflammation*

72 To further investigate the neuropathogenesis of brain organoids subjected to WSN infection, we conducted  
73 related assays, including apoptosis and inflammatory factor release after WSN infection at 1 dpi and 4 dpi (**Fig.**  
74 **5A**). Significant cell apoptosis of SOX2<sup>+</sup> NSCs and MAP2<sup>+</sup> neurons in day 30 and day 60 brain organoids at  
75 1 dpi and 4 dpi was observed by TUNEL staining (**Fig. 5B, C**). The percentage of TUNEL<sup>+</sup> cells was a  
76 time-dependent increase, and the apoptosis of NSCs was higher than neurons during early WSN infection (**Fig.**  
77 **5D, E**). Unlike Zika virus infection, which mainly induces the apoptosis of NSCs to result in  
78 microcephaly (Tang et al., 2016), WSN primarily infects MAP2<sup>+</sup> neurons and causes the apoptosis of both  
79 NSCs and neurons. We also detected the apoptosis of GFAP<sup>+</sup> astrocytes in day 250 organoids, and we did not  
80 observe obvious apoptosis (**Fig. 5F**). Next, we determined the inflammatory factor levels in supernatants from

81 days 30 and 60 brain organoids by enzyme linked immunosorbent assay (ELISA). We found that TNF- $\alpha$ ,  
82 INF- $\gamma$ , IL-6, CCL2, and COX2 in organoid supernatants were significantly increased in a time-dependent  
83 manner from days 30 and 60 brain organoids (**Fig. 5G, H**). At the cellular level, we also confirmed that  
84 influenza virus could induce NSC apoptosis (**Fig. S1C, D**) and inhibit proliferation (**Fig. S1E, F**), but did not  
85 induce astrocyte apoptosis (**Fig. S1I**). Taken together, these results suggested that WSN could impair brain  
86 organoid growth through eliciting apoptosis and inflammation (**Fig. 5I**).

### 87 *Antiviral and neuroprotective effects of drugs and neurotrophic factors*

88 As these results demonstrated, WSN did impair the human brain through inducing cell apoptosis and  
89 inflammation responses using *in vitro* brain organoid models. Therefore, we performed antiviral screening  
90 studies. We first analyzed several compounds, PYC-12, RO3306, and WHL-50B, at the cellular level, and we  
91 used nucleozin as a positive control, as it induces nuclear accumulation of influenza virus nucleoprotein (NP)  
92 leading to cessation of viral replication (Gerritz et al., 2011; Kao et al., 2010). Our results showed that  
93 PYC-12, WHL-50B, and nucleozin all significantly suppressed virus infection compared to RO3306 (**Fig.**  
94 **S4A**), and PYC-12 could also suppress WSN infection in astrocytes, but not as clearly as nucleozin (**Fig. S4B**).  
95 Next, we further evaluated the antiviral effect of four compounds at the organoid level. Briefly, day 40 brain  
96 organoids were first treated with four compounds for 2 hours, followed by co-treatment with WSN and  
97 compounds for 1 hour, followed by continued compound treatment for the indicated number of days (**Fig. 6A**).  
98 Representative bright field images showed that PYC-12 could significantly rescue the morphological changes  
99 of brain organoids compared to the WSN infection group (**Fig. 6B**). Additionally, three compounds, peramivir,  
100 PYC-12, and WHL-50B, were used in drug screening of H3N2-infected organoids, and the results showed that

peramivir as a positive drug, which is a highly selective inhibitor of influenza A and B neuraminidase (Kohno et al., 2011), had the highest antiviral effects compared to other drugs (**Fig. S5**). Statistical analysis of the diameter and area of organoids treated with PYC-12 also demonstrated its rescue effects (**Fig. 6C, D**). Therefore, we used PYC-12 for our following studies. Immunostaining of SOX2<sup>+</sup> NSCs and MAP2<sup>+</sup> neurons on day 30 and day 60 brain organoids infected by WSN revealed that PYC-12 treatment could significantly inhibit WSN infection (**Fig. 6E**) and cell apoptosis (**Fig. 6F**) at 1 dpi and 4 dpi. PYC-12 also decreased the extracellular and intracellular viral titers (**Fig. 6G**), as well as decreasing IL-6 and TNF- $\alpha$  production (**Fig. 6H**). Microelectrode array (MEA) analysis showed that PYC-12 could increase the weighted mean firing rate (Hz) of brain organoids compared to WSN infection at indicated time points (**Fig. 6I, J**). Collectively, we screened a potential drug candidate-PYC-12 against WSN infection using brain organoid models (**Fig. 6K**).

In addition, neurotrophic factors (NFs), which are endogenous soluble proteins regulating the survival and growth of neurons, protect human normal brain functions against microbial pathogens have been reported in the literature (Platholi and Lee, 2018). Thus, to investigate whether NFs also have antiviral effects in *in vitro* organoid models, we conducted antiviral assays with the same treatments (**Fig. 6A**). First, we demonstrated that brain-derived neurotrophic factor (BDNF), glial-derived neurotrophic factor (GDNF), neurotrophin-3 (NT3), and their combinations (GBN) could significantly inhibit WSN infection at the NESTIN<sup>+</sup> NSCs level (**Fig. S6A**), especially BDNF and GBN in NP<sup>+</sup> cells (**Fig. S6B**). All three NFs and GBN showed decreased intracellular virus titers (**Fig. S6C**), while only GBN inhibited extracellular virus titers at the NSC level (**Fig. S6D**). Then, we confirmed the antiviral effect of GBN on day 30 organoids (**Fig. S6E, F**), and GBN showed decreases in intracellular and extracellular virus titers (**Fig. S6G, H**). GBN significantly inhibited WSN

!21 infection through decreasing both cell apoptosis (**Fig. S6I, J**) and inflammatory factor release (**Fig. S6K**). At  
!22 the gene level, we found that NF could significantly induce a set of ISG expressions, such as *MCL1*, *IFITM3*,  
!23 *B2M*, *BST2*, *OAS1*, and *PKR* to function against virus infection (**Fig. S7**). Collectively, neurotrophic factors  
!24 also possessed antiviral roles via inducing ISG expression to suppress cell apoptosis and inflammation  
!25 response in brain organoid models (**Fig. S6L**), and implicating the possibility of a combination therapy in the  
!26 future.

## 127 **Discussion**

128 The neuropathogenesis of the human brain caused by influenza virus remains poorly understood. In the light  
129 of this fundamental problem, we designed an experimental platform using human brain organoids as a virus  
130 infection model to study this neuropathogenesis in detail. Brain organoids serve as an invaluable tool in the  
131 field of virus research to investigate the molecular events underlying virus replication and antiviral drug  
132 screening.

133 In this study, we first demonstrated that influenza virus (H1N1-WSN) could widely infect multiple cell types  
134 in brain organoids, including SOX2<sup>+</sup> neural stem cells (NSCs), MAP2<sup>+</sup> neurons, and GFAP<sup>+</sup> astrocytes, and  
135 holds an infection tropism of MAP2<sup>+</sup> neurons (**Fig. 3**), which may support a direct link between influenza  
136 virus infection and the neurologic symptoms. Inflammatory factors (e.g., IL-6, TNF- $\alpha$ , and INF- $\gamma$ ) induced by  
137 WSN infection in brain organoids (**Fig. 5G, H**) may be the major cause for viral entrance into the brain  
138 through damaging the blood brain barrier (BBB) (Shlosberg et al., 2010). However, whether other virulent  
139 influenza viruses (e.g., H3N2, H5N1, or H7N9) have similar results needs further investigation in higher level  
140 of biosafety laboratories. Unlike WSN infection, Zika virus preferentially infects human cortical neural  
141 progenitor cells with high efficiency, but exhibits lower levels of infection in human embryonic stem cells  
142 (ESCs), hPSCs, and immature cortical neurons (Wu et al., 2018). Therefore, regional and cell type specific  
143 tropism of virus infection may directly support a link with specific pathological syndromes.

144 As is well known, although brain organoids can serve as a model of a three-dimensional organ to achieve  
145 multiple cellular interactions not possible with cell lines, organoids are very immature and only partly model  
146 the human brain. Therefore, which type of neurons are specifically infected with influenza virus in brain

247 organoids needs further study in our next work. Some research groups have leveraged virulent viruses (e.g.,  
248 H5N1, H5N3, or H3N2) (Mori and Kimura, 2001) to infect mice, and have demonstrated the route of brain  
249 infection, but cell type-specific tropism of viral infection in the central nervous system remain poorly  
250 understood. Therefore, if we completely confirm the cell type-specific infections of influenza or other viruses,  
251 it should provide a scientific basis for developing specific neurological disorder drugs. Single-cell RNA  
252 sequencing technology (Hwang et al., 2018; Ofengeim et al., 2017) could be used to track specific cell types  
253 infected by viruses in space and time through detecting the gene expression of viruses, while human brain  
254 tissue infected by viruses are very hard to get and labeling hundreds or thousands of nerve cells is difficult for  
255 current single-cell RNA sequencing technology.

256 In addition, we found that WSN could infect astrocytes (**Fig. 3J**), but not induce their apoptosis (**Fig. 5F, S1**),  
257 which was similar to brain organoids infected with SARS-CoV-2 (Song et al., 2020). This finding may  
258 indicate that virus-infected astrocytes can lead to peripheral cell death by creating a locally hypoxic and a  
259 resource-restricted environment for cells. Furthermore, we performed whole RNA transcriptomic analysis for  
260 comparison of a control and 4 dpi and 1 dpi group and identified some upregulated protein targets (e.g., CCL7,  
261 NCOA4P2, GBP1P1, CXCL10, CXCL11, CSAG3, and OAS2) and noncoding RNAs (e.g., BISPR,  
262 AC116407.2, AC092687.3, and MIR4435-2HG), implicating these for the development of new antiviral  
263 targets. However, whether these targets can exert antiviral effects needs to be further validated in future work.  
264 Finally, we performed antiviral screening using brain organoids and found a potential antiviral drug, PYC-12,  
265 which could significantly suppress virus replication, apoptosis of NSCs and neurons, and inflammatory  
266 responses (**Fig. 6**). However, whether the identified drug could enter into the brain through the BBB needs to



!67 be validated in animal models. Next, we intend to conduct a high throughput antiviral drug screening study  
!68 using this organoid platform. Moreover, we also explored the antiviral and neuroprotective effects of  
!69 neurotrophic factors such as GDNF, BDNF, and NF3 (**Fig. S6**), and demonstrated that they also did suppress  
!70 WSN infection, the apoptosis of NSCs and neurons, and inflammatory responses. This work also highlights  
!71 the possibility of using a combinations therapy of drugs and neurotrophic factors in clinical treatment for viral  
!72 infection.

### !73 **Conclusion**

!74 In this study, using an *in vitro* brain organoid model, we demonstrated that MAP2<sup>+</sup> neurons were more  
!75 susceptible to influenza virus (H1N1-WSN) infection, unveiled the neuropathogenesis of the brain through  
!76 inducing apoptosis and inflammation, and conducted antiviral screening to achieve antiviral and  
!77 neuroprotective aims. In summary, we establish a tractable experimental model system to investigate the  
!78 impact and mechanism of influenza virus on human brain development, and provide a platform for identifying  
!79 therapeutic compounds.

!80

!81

!82

!83

!84

!85

## 186 **Materials and Methods**

### 187 **Cell culture and reagents**

188 Human HEK293T (CRL-11268) and Madin-Darby Canine Kidney (MDCK) cells (ATCC, CRL-2936) were  
189 maintained in Dulbecco's Minimal Essential Medium (DMEM) (Gibco) supplemented with 10% fetal bovine  
190 serum (Gibco), 100 units/mL penicillin, and 100 µg/mL streptomycin (Invitrogen). Authentication and test for  
191 the free of mycoplasma were performed with MycAway™ one-step mycoplasma detection kit (Yeasen).  
192 Astrocytes were purchased from Cellapy (CA2315106) and cultured in NeuroEasy maintenance medium  
193 (Cellapy). Human embryonic stem cells (hESCs) were obtained from Harvard Stem Cell Institute. hESCs were  
194 routinely checked for pluripotent, normal karyotype, mycoplasma free and cultured in feeder-free conditions  
195 on Matrigel-coated plates with Essential 8 medium (GIBCO) and passaged with TrypLE™ express (GIBCO).  
196 10 µM Peramivir (M3222, AbMole BioScience), 1 µM Nucleozin (A3670, Apexbio), 50 µM PYC-12, 20 µM  
197 RO3306, 10 µM WHL-50B, 20 ng/mL BDNF (450-02, PeproTech), 20 ng/mL GDNF (450-10, PeproTech),  
198 20 ng/mL NT3 (450-03, PeproTech) were used in this study.

### 199 **Viruses**

300 Three H1N1 strains (WSN, CA07 and PR8), Enterovirus 68/71, and SFTSV obtained from Academy of  
301 Military Medical Sciences were used in this study. All viruses' stocks were prepared in MDCK cells and  
302 titrated by TCID<sub>50</sub> on MDCK cells as described in details below. Studies with infectious H1N1 were  
303 conducted under biosafety level 2 (BSL-2) conditions at the Peking University Health Science Center with  
304 approval from Institutional Biosafety Committee.

### 305 **Neural stem cells (NSCs) differentiation**

hESCs were differentiated into NSCs on Matrigel-coated plates using the monolayer protocol as previously described(Lippmann et al., 2014). Briefly, hESCs were first dissociated into single cells with Accutase (STEMCELL). Then, hESCs were plated onto Matrigel at a density of  $2 \times 10^5$  cells/cm<sup>2</sup> in E8 medium containing 10  $\mu$ M ROCK inhibitor (STEMCELL Technologies) and cultured overnight. 24 h later, cells were changed to E6 medium (GIBCO) containing 10  $\mu$ M SB431542 (STEMCELL) and 100 nM LDN193189 (Selleckchem) to initiate differentiation. Medium was changed every day until day 7. Day 7-NSCs were used for the following experiments.

### **Brain organoids generation and culture**

Brain organoids were generated from hESCs as previously described(Lancaster and Knoblich, 2014), but slightly modified. Briefly, for embryoid body (EB) formation, hESCs were washed twice with DPBS, incubated with Accutase for 5 minutes, and dissociated into single cells. 3000 single cells were seeded in each well of low attachment 96-well U-bottom plate in E8 medium containing 10  $\mu$ M ROCK inhibitor and centrifuged at 100 g for 3 min, then medium was half changed every other day. On day 4, EBs were transferred to low attachment 24-well plate in neural induction medium containing DMEM-F12 (GIBCO) with 1% N2 supplement (GIBCO), 1% Glutamax supplement (GIBCO), 1% MEM-NEAA (GIBCO) and 1  $\mu$ g/mL Heparin (GIBCO), and medium was changed after 48 h. On day 7, EBs were transferred into Matrigel droplets as previously described and cultured in brain organoid differentiation media containing 50% DMEM-F12, 50% Neurobasal, 200x N2 supplement, 0.025% Insulin (GIBCO), 100x Glutamax supplement, 200x MEM-NEAA, 100x penicillin-streptomycin, 0.035% 2-Mercaptoethanol and 100x B27 supplement without Vitamin A, and medium was changed after 48 h. On day 10, organoids were transferred to orbital shaker (Corning) in brain

126 organoid differentiation media with Vitamin A, medium was changed every 4 days.

### 127 **Virus infection**

128 For cell line infection, H9, NSCs and astrocytes were seeded in chamber at  $1 \times 10^6$  cells. The cells were then  
129 rinsed with PBS, and WSN was diluted to the desired multiplicity of infection (MOI) of 1 and added to the  
130 cells. The cells were incubated for 2 h at 37 °C. The supernatant was removed and the cells were washed twice  
131 with PBS. Culture medium with 1% FBS and 1000x TPCK (final concentration 1 µg/mL) was added to each  
132 well, and cells were incubated at 37 °C and 5% CO<sub>2</sub>, after 24 h infection, cells were prepared for  
133 immunofluorescence staining. For brain organoids infection, organoids were transferred to low attachment  
134 24-well plate and washed twice with DPBS, and WSN was diluted to the desired multiplicity of infection  
135 (MOI) of 1 and added to the cultured medium. The organoids were incubated for 8 h at 37 °C. The supernatant  
136 was removed and the cells were washed twice with DPBS, and then organoids were transferred to low  
137 attachment 6-well plate, 4 mL culture medium with 1% FBS and 1000x TPCK (final concentration 1 µg/mL)  
138 was added to each well, and organoids were incubated at 37 °C and 5% CO<sub>2</sub> at a shake speed of 60 rpm, after  
139 24 h and 96 h infection, organoids were prepared for immunofluorescence staining, RNA extraction and  
140 RNA-seq, and the supernatant was harvested for ELISA and virus titration.

### 141 **Immunofluorescence staining**

142 For cell immunofluorescence staining, the cells were fixed with 4% PFA at room temperature for 10 min,  
143 permeated with PBST (PBS with 0.1% Triton X-100) for 20 min and blocked with 1% BSA for 30 min. Then  
144 the cells were incubated with primary antibodies listed in **Supplementary Table 1** at 4 °C overnight. The  
145 cells were subsequently incubated with secondary antibodies listed in **Supplementary Table 1** at room

346 temperature for 1 h. The cells were mounted with mounting fluid containing DAPI (Yeason, 36308ES11). For  
347 organoid immunofluorescence staining, the organoids were fixed with 4% PFA at room temperature for 30  
348 min, then immersed in 30% (w/v) sucrose until submersion before embedding and freezing in the Optimal  
349 Cutting Temperature (OCT) compound (Tissue-Tek). Serial 12  $\mu\text{m}$  sections were obtained by cryo-sectioning  
350 of the embedded organoid at  $-20\text{ }^{\circ}\text{C}$  using a cryostat (Leica). Cryosections were permeated with in PBST at  
351 temperature for 30 min and blocked with sheep serum (Zhongshanjinqiao, ZLI-9022) for 1 h. The sections  
352 were incubated with primary antibodies listed in **Supplementary Table 1** diluted in blocking buffer at  $4\text{ }^{\circ}\text{C}$   
353 overnight. The slides were subsequently incubated with secondary antibody at room temperature for 1 h. The  
354 slides were mounted with mounting fluid containing DAPI. Stained sections were photographed under a  
355 Nikon Ti-S microscope. Apoptotic cells were labelled with Click-It Plus TUNEL assay (C10619,  
356 ThermoFisher Scientific).

### 357 **RNA isolation and quantitative RT-PCR**

358 Total RNA was extracted from cells or organoids using the Quick-RNA MicroPrep kit (Zymo Research).  
359 RNA was subjected to quantitative real-time PCR in accordance with the protocol provided by one-step SYBR  
360 green RT-PCR Kit (Cwbio). The transcripts were quantitated and normalized to the internal GAPDH control.  
361 The primers used in the experiments are listed in **Supplementary Table 2**. The PCR conditions were 1 cycle  
362 at  $95\text{ }^{\circ}\text{C}$  for 5 min, followed by 40 cycles at  $95\text{ }^{\circ}\text{C}$  for 15 s,  $60\text{ }^{\circ}\text{C}$  for 1 min, and 1 cycle at  $95\text{ }^{\circ}\text{C}$  for 15 s,  
363  $60\text{ }^{\circ}\text{C}$  for 15 s,  $95\text{ }^{\circ}\text{C}$  for 15 s. The results were calculated using the  $2^{-\Delta\Delta\text{CT}}$  method according to the GoTaq  
364 qPCR Master Mix (Promega) manufacturer's specifications.

### 365 **Virus quantification by 50% tissue culture infective dose**

366 For quantifying all viruses' stocks, the 50% tissue culture infectious dose (TCID<sub>50</sub>/mL) titers were determined.  
367 In brief, 5×10<sup>4</sup> HEK293T cells were seeded in 96-well plates the day before infection. The virus samples were  
368 serially diluted with DMEM containing 1% FBS (10<sup>3</sup> to 10<sup>10</sup>) and then each of dilution was added in wells  
369 separately. The plates were incubated at 37 °C in 5% CO<sub>2</sub> for 2-5 days. The cytopathic effect (CPE) was  
370 observed under a microscope and determined virus titer using the Reed-Münch endpoint calculation method.

### 371 **Microelectrode arrays (MEA)**

372 Day 40 brain organoids were seeded onto 48-well transparent MEA plates. Brain organoids were cultured in  
373 brain organoid differentiation media containing 50% DMEM-F12, 50% Neurobasal, 200x N2 supplement,  
374 0.025% Insulin (GIBCO), 100x Glutamax supplement, 200x MEM-NEAA, 100x penicillin-streptomycin,  
375 0.035% 2-Mercaptoethanol and 100x B27 supplement with Retinoic Acid (RA). MEA recordings were  
376 performed on day 3, 5, 7, 9, 11, 13 at 37 °C in a Maestro MEA system with AxIS software using a bandwidth  
377 with a filter for 10Hz to 2.5 kHz cutoff frequencies. For the pharmacological experiment, 50 μM PYC-12 were  
378 applied to plate immediately before recording. For MEA recording, brain organoids treated with WSN were  
379 included as the control organoids. The phase contrast images of organoids seeded in the MEA plates were  
380 taken after MEA recording.

### 381 **Enzyme-linked immunosorbent assay (ELISA)**

382 Inflammatory factors (TNF-α, INF-γ, IL-6, CCL2, COX2) in cultured supernatants of brain organoids with or  
383 without challenging by virus was measured using a commercial ELISA Kit (Dogesce). Briefly, samples were  
384 double diluted using the dilution buffer, and the optical density (OD) was measured at 450 nm with an ELISA  
385 reader (Beckman). The concentration of inflammatory factors was calculated according to the manufacturer's

186 instruction.

### 187 **The whole transcriptome analysis**

188 High throughput RNA sequencing was performed by Cloud-Seq Biotech (Shanghai, China). Total RNA was  
189 extracted from organoids (three biological replicates for each group) by TRIzol and the rRNAs were removed  
190 with NEBNext rRNA Depletion Kit (New England Biolabs, Inc., Massachusetts, USA). RNA libraries were  
191 constructed using the NEBNext® Ultra™ II Directional RNA Library Prep Kit (New England Biolabs, Inc.,  
192 Massachusetts, USA) following the manufacturer's instructions. The libraries were quality-controlled and  
193 quantified using the BioAnalyzer 2100 system (Agilent Technologies, Inc., USA). The library sequencing was  
194 performed on an Illumina HiSeq instrument with 150 bp paired end reads. Paired-end reads were harvested  
195 from Illumina HiSeq 4000 sequencer, and quality-controlled by Q30. After 3' adaptor-trimming and removing  
196 low-quality reads by cutadapt software (v1.9.3), high-quality clean reads were aligned to the reference genome  
197 (UCSC MM10) with hisat2 software (v2.0.4). Guided by the Ensembl gtf gene annotation file, the cuffdiff  
198 software (part of cufflinks) was used to obtain the gene level FPKM as the expression profiles of mRNA. The  
199 total expressed gene number and LogFPKM of mRNA in different mouse groups were plotted and compared.

### 100 **Statistical analysis**

101 All data were analyzed using the GraphPad Prism 9 software. For the statistical analysis of other results,  
102 statistical evaluation was performed by Student's unpaired t-test or one-way ANOVA with Tukey's multiple  
103 comparisons test. Data are presented as means  $\pm$  SD or as described in the corresponding legends. A  
104 probability of  $p < 0.05$  was considered as statistically significant. For annotations of significance, \* $p < 0.05$ ;  
105 \*\* $p < 0.01$ ; \*\*\* $p < 0.001$ ; \*\*\*\* $p < 0.0001$ .

106 **Data availability**

107 All other data supporting this study are available within this paper and its Supplementary Information.

108

109



## l10 **Acknowledgements**

l11 This work was funded by China's National Science and Technology Major Projects for Major New Drugs  
l12 Innovation and Development (No. 2018ZX09711003-001-003).

## l13 **Author contributions**

l14 Q. X. conceived the idea and X. Z. initiated the project. X. Z. and H. L. analyzed the sequencing data,  
l15 prepared the figures, and wrote the draft. Z. X. performed the flow cytometry and cytokine release activity  
l16 assays. All authors had access to the data. K. Y., L. T. and L. D. verified the data. All co-first authors and  
l17 corresponding authors discussed the results and revised the paper.

## l18 **Additional information**

l19 **Supporting information** is available for this paper.

## l20 **Conflict of interest statement**

l21 The authors have declared that no conflict of interest exists.

l22

## l23 **References**

- l24 Cao, J., Lu, G., Wen, L., Luo, P., Huang, Y., Liang, R., Tang, K., Qin, Z., Chan, C.C.Y., Chik, K.K.H., et al.  
l25 (2021). Severe fever with thrombocytopenia syndrome virus (SFTSV)-host interactome screen identifies viral  
l26 nucleoprotein-associated host factors as potential antiviral targets. *Comput. Struct. Biotechnol. J.* *19*,  
l27 5568–5577.
- l28 Chen, X., Sun, G., Tian, E., Zhang, M., Davtyan, H., Beach, T.G., Reiman, E.M., Blurton-Jones, M.,  
l29 Holtzman, D.M., and Shi, Y. (2021). Modeling Sporadic Alzheimer’s Disease in Human Brain Organoids  
l30 under Serum Exposure. *Adv. Sci.* *8*, 1–16.
- l31 De Crignis, E., Hossain, T., Romal, S., Carofiglio, F., Moulos, P., Khalid, M.M., Rao, S., Bazrafshan, A.,  
l32 Verstegen, M.M.A., Pourfarzad, F., et al. (2021). Application of human liver organoids as a patient-derived  
l33 primary model for HBV infection and related hepatocellular carcinoma. *Elife* *10*, 1–32.
- l34 Dang, J., Tiwari, S.K., Lichinchi, G., Qin, Y., Patil, V.S., Eroshkin, A.M., and Rana, T.M. (2016). Zika Virus  
l35 Depletes Neural Progenitors in Human Cerebral Organoids through Activation of the Innate Immune Receptor  
l36 TLR3. *Cell Stem Cell* *19*, 258–265.
- l37 Das, K., Aramini, J.M., Ma, L.C., Krug, R.M., and Arnold, E. (2010). Structures of influenza A proteins and  
l38 insights into antiviral drug targets. *Nat. Struct. Mol. Biol.* *17*, 530–538.
- l39 Englund, J., Feuchtinger, T., and Ljungman, P. (2011). Viral Infections in Immunocompromised Patients. *Biol.*  
l40 *Blood Marrow Transplant.* *17*, S2–S5.
- l41 Gerritz, S.W., Cianci, C., Kim, S., Pearce, B.C., Deminie, C., Discotto, L., McAuliffe, B., Minassian, B.F., Shi,  
l42 S., Zhu, S., et al. (2011). Inhibition of influenza virus replication via small molecules that induce the formation

- 143 of higher-order nucleoprotein oligomers. *Proc. Natl. Acad. Sci. U. S. A.* *108*, 15366–15371.
- 144 Han, J., Perez, J., Schafer, A., Cheng, H., Peet, N., Rong, L., and Manicassamy, B. (2018). Influenza Virus:  
145 Small Molecule Therapeutics and Mechanisms of Antiviral Resistance. *Curr. Med. Chem.* *25*, 5115–5127.
- 146 Hoekstra, P.J. (2019). Attention-deficit/hyperactivity disorder: is there a connection with the immune system?  
147 *Eur. Child Adolesc. Psychiatry* *28*, 601–602.
- 148 Hwang, B., Lee, J.H., and Bang, D. (2018). Single-cell RNA sequencing technologies and bioinformatics  
149 pipelines. *Exp. Mol. Med.* *50*, 1–14.
- 150 Johansson, A., Mohamed, M.S., Moulin, T.C., and Schiöth, H.B. (2020). Neurological manifestations of  
151 COVID-19: A comprehensive literature review and discussion of mechanisms. *J. Neuroimmunol.* *358*,  
152 577658.
- 153 Kao, R.Y., Yang, D., Lau, L.S., Tsui, W.H.W., Hu, L., Dai, J., Chan, M.P., Chan, C.M., Wang, P., Zheng, B.J.,  
154 et al. (2010). Identification of influenza A nucleoprotein as an antiviral target. *Nat. Biotechnol.* *28*, 600–605.
- 155 Keipp Talbot, H., and Falsey, A.R. (2010). The diagnosis of viral respiratory disease in older adults. *Clin.*  
156 *Infect. Dis.* *50*, 747–751.
- 157 Kohno, S., Kida, H., Mizuguchi, M., Hirotsu, N., Ishida, T., Kadota, J., Shimada, J., and Seki, M. (2011).  
158 Intravenous peramivir for treatment of influenza A and B virus infection in high-risk patients. *Antimicrob.*  
159 *Agents Chemother.* *55*, 2803–2812.
- 160 Koyuncu, O.O., Hogue, I.B., and Enquist, L.W. (2013). Virus infections in the nervous system. *Cell Host*  
161 *Microbe* *13*, 379–393.
- 162 Lancaster, M.A., and Knoblich, J.A. (2014). Generation of cerebral organoids from human pluripotent stem

- l63 cells. *Nat. Protoc.* *9*, 2329–2340.
- l64 Liang, C.Y., Yang, C.H., and Lin, J.N. (2018). Focal Encephalitis, Meningitis, and Acute Respiratory Distress  
l65 Syndrome Associated with Influenza A Infection. *Med. Princ. Pract.* *27*, 193–196.
- l66 Lippmann, E.S., Estevez-Silva, M.C., and Ashton, R.S. (2014). Defined human pluripotent stem cell culture  
l67 enables highly efficient neuroepithelium derivation without small molecule inhibitors. *Stem Cells* *32*,  
l68 1032–1042.
- l69 Malterer, M.B., Glass, S.J., and Newman, J.P. (2014). Interferon-stimulated genes: A complex web of host  
l70 defenses. *Annu. Rev. Immunol.* *44*, 735–745.
- l71 McGavern, D.B., and Kang, S.S. (2011). Illuminating viral infections in the nervous system. *Nat. Rev.*  
l72 *Immunol.* *11*, 318–329.
- l73 Mori, I., and Kimura, Y. (2001). Neuropathogenesis of influenza virus infection in mice. *Microbes Infect.* *3*,  
l74 475–479.
- l75 Ofengeim, D., Giagtzoglou, N., Huh, D., Zou, C., and Yuan, J. (2017). Single-Cell RNA Sequencing:  
l76 Unraveling the Brain One Cell at a Time. *Trends Mol. Med.* *23*, 563–576.
- l77 Ooi, M.H., Wong, S.C., Lewthwaite, P., Cardoso, M.J., and Solomon, T. (2010). Clinical features, diagnosis,  
l78 and management of enterovirus 71. *Lancet Neurol.* *9*, 1097–1105.
- l79 Platholi, J., and Lee, F.S. (2018). Chapter 5 - Neurotrophic Factors (Elsevier Inc.).
- l80 Qian, X., Song, H., and Ming, G. (2019). Brain organoids: advances, applications and challenges.  
l81 *Development* *146*, dev166074.
- l82 Sachs, N., de Lig, J., Kopper, O., Gogola, E., Bounova, G., Weeber, F., Balgobind, A.V., Wind, K., Gracanin,

- 183 A., Begthel, H., et al. (2018). A Living Biobank of Breast Cancer Organoids Captures Disease Heterogeneity.  
184 *Cell* *172*, 373-386.e10.
- 185 Sauer, A.K., Stanton, J.E., Hans, S., and Grabrucker, A.M. (2021). Autism Spectrum Disorders: Etiology and  
186 Pathology. *Autism Spectr. Disord. Chapter 1*, 1–16.
- 187 Shlosberg, D., Benifla, M., Kaufer, D., and Friedman, A. (2010). Blood-brain barrier breakdown as a  
188 therapeutic target in traumatic brain injury. *Nat. Rev. Neurol.* *6*, 393–403.
- 189 Song, E., Zhang, C., Israelow, B., Lu, P., Weizman, O., Liu, F., Dai, Y., Szigeti-buck, K., Yasumoto, Y.,  
190 Wang, G., et al. (2020). Neuroinvasive potential of SARS-CoV-2 revealed in a human brain organoid model  
191 Eric. *BioRxiv*.
- 192 Tang, H., Hammack, C., Ogden, S.C., Wen, Z., Qian, X., Li, Y., Yao, B., Shin, J., Zhang, F., Lee, E.M., et al.  
193 (2016). Zika virus infects human cortical neural progenitors and attenuates their growth. *Cell Stem Cell* *18*,  
194 587–590.
- 195 Tregoning, J.S., and Schwarze, J. (2010). Respiratory viral infections in infants: Causes, clinical symptoms,  
196 virology, and immunology. *Clin. Microbiol. Rev.* *23*, 74–98.
- 197 Vehapoglu, A., Turel, O., Uygur Sahin, T., Kutlu, N.O., and Iscan, A. (2015). Clinical Significance of Human  
198 Metapneumovirus in Refractory Status Epilepticus and Encephalitis: Case Report and Review of the Literature.  
199 *Case Rep. Neurol. Med.* *2015*, 1–4.
- 500 Van De Wetering, M., Francies, H.E., Francis, J.M., Bounova, G., Iorio, F., Pronk, A., Van Houdt, W., Van  
501 Gorp, J., Taylor-Weiner, A., Kester, L., et al. (2015). Prospective derivation of a living organoid biobank of  
502 colorectal cancer patients. *Cell* *161*, 933–945.

503 Wu, X., Dao Thi, V.L., Huang, Y., Billerbeck, E., Saha, D., Hoffmann, H.H., Wang, Y., Silva, L.A.V.,

504 Sarbanes, S., Sun, T., et al. (2018). Intrinsic Immunity Shapes Viral Resistance of Stem Cells. *Cell* *172*,

505 423-438.e25.

506 Yu, J. (2021). Organoids: A New Model for SARS-CoV-2 Translational Research. *Int. J. Stem Cells* *14*,

507 138–149.

508

509

510 **Figures and legends**

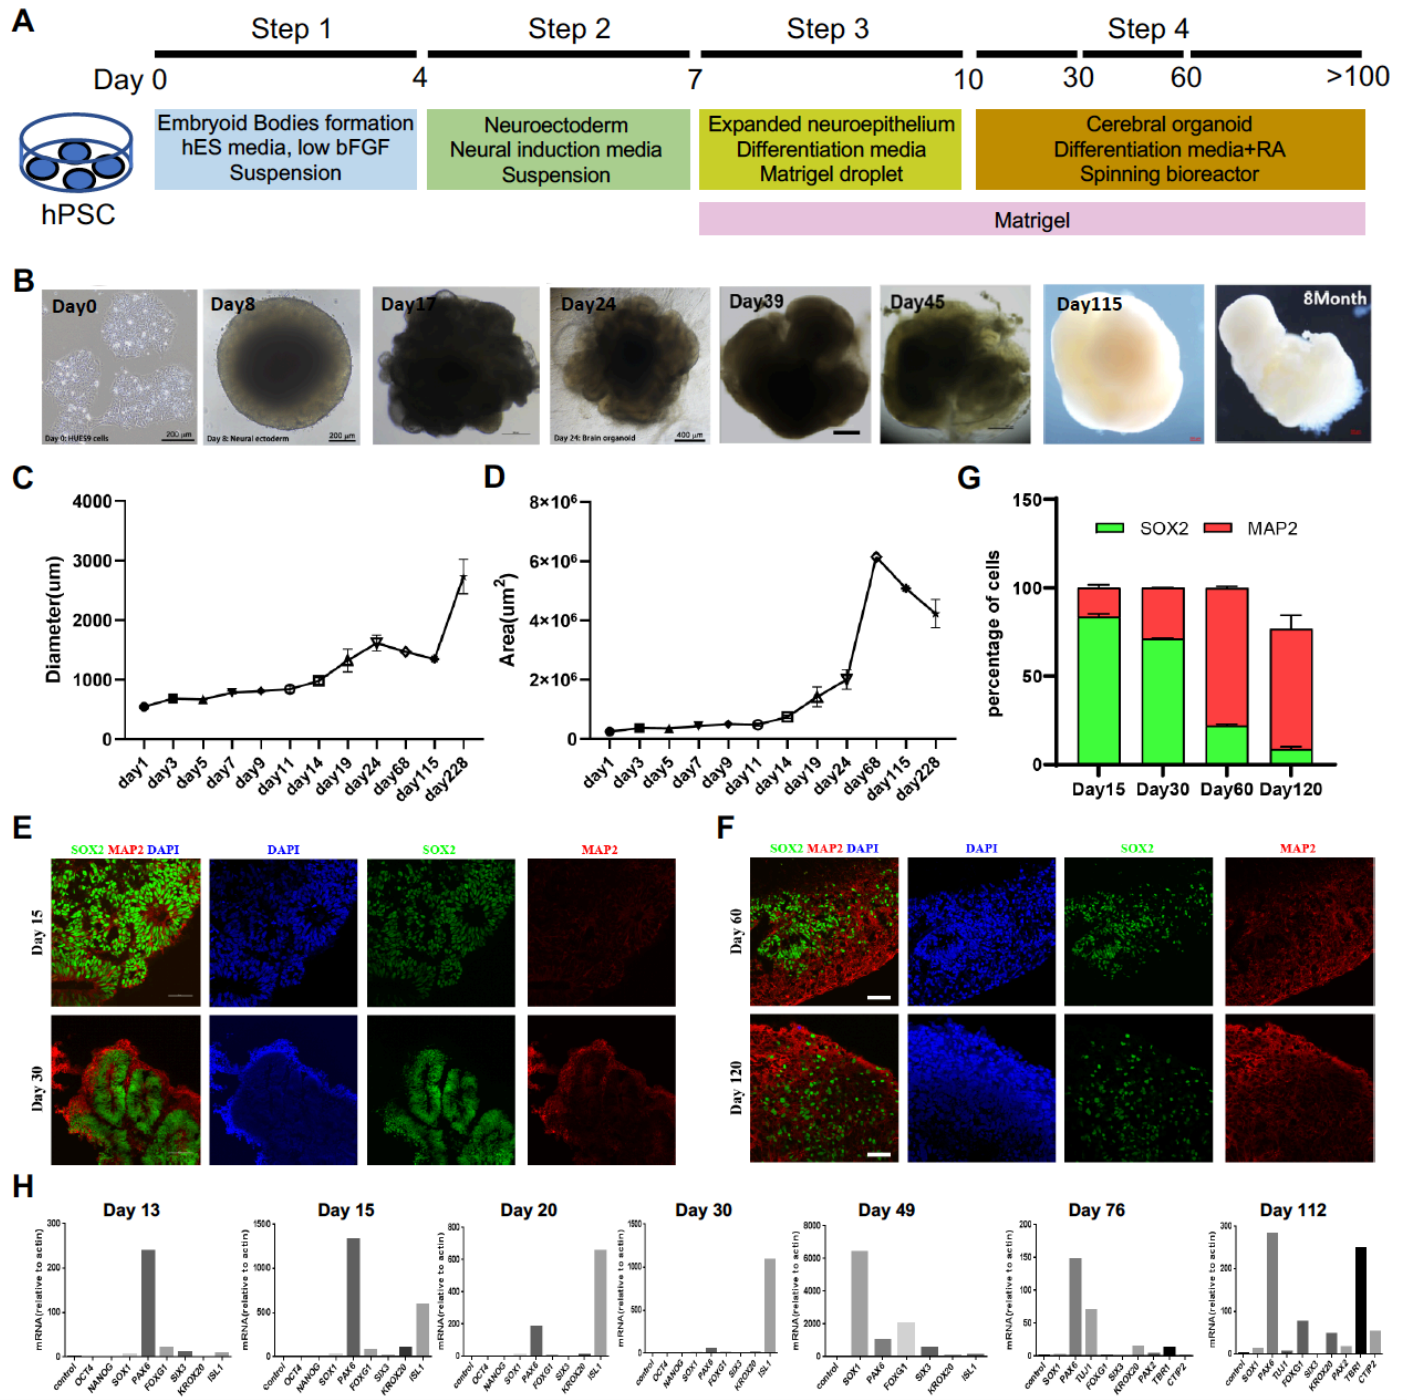

511

512 **Figure 1. Generation and characterization of brain organoids.** (A) Schematic illustration of organoid

513 generation. (B) Representative bright-field images of brain organoids derived from hPSCs at day 0, day 8, day

514 17, day 24, day 39, day 45, day 115, and 8 months. Scale bars, 200  $\mu\text{m}$  and 400  $\mu\text{m}$ . **(C, D)** Growth kinetics of  
515 area ( $\mu\text{m}^2$ ) and diameter ( $\mu\text{m}$ ) of brain organoids during development. **(E, F)** Immunostaining of brain  
516 organoids with SOX2<sup>+</sup> NSCs and MAP2<sup>+</sup> neurons on day 15, 30, 60 and 120. Scale bars, 100  $\mu\text{m}$ . **(G)** The  
517 percentage of SOX2<sup>+</sup> and MAP2<sup>+</sup> cells in day 15, 30, 60, and 120 brain organoids. The majority of cells on  
518 days 15 and 30 organoids were SOX2<sup>+</sup> neural stem cells and MAP2<sup>+</sup> neurons on days 60 and 120 organoids.  
519 **(H)** Quantitative RT-PCR analysis of the specific markers of brain organoids at indicated timepoints. hPSC  
520 markers: *OCT4* and *NANOG*; NSC marker: *PAX6*; forebrain markers: *FOXG1* and *SIX3*; hindbrain markers:  
521 *KROX20* and *ISL1*; neuron marker: *TUJ1*; deep-layer cortical neuron markers: *CTIP2* and *TBR1*.

522



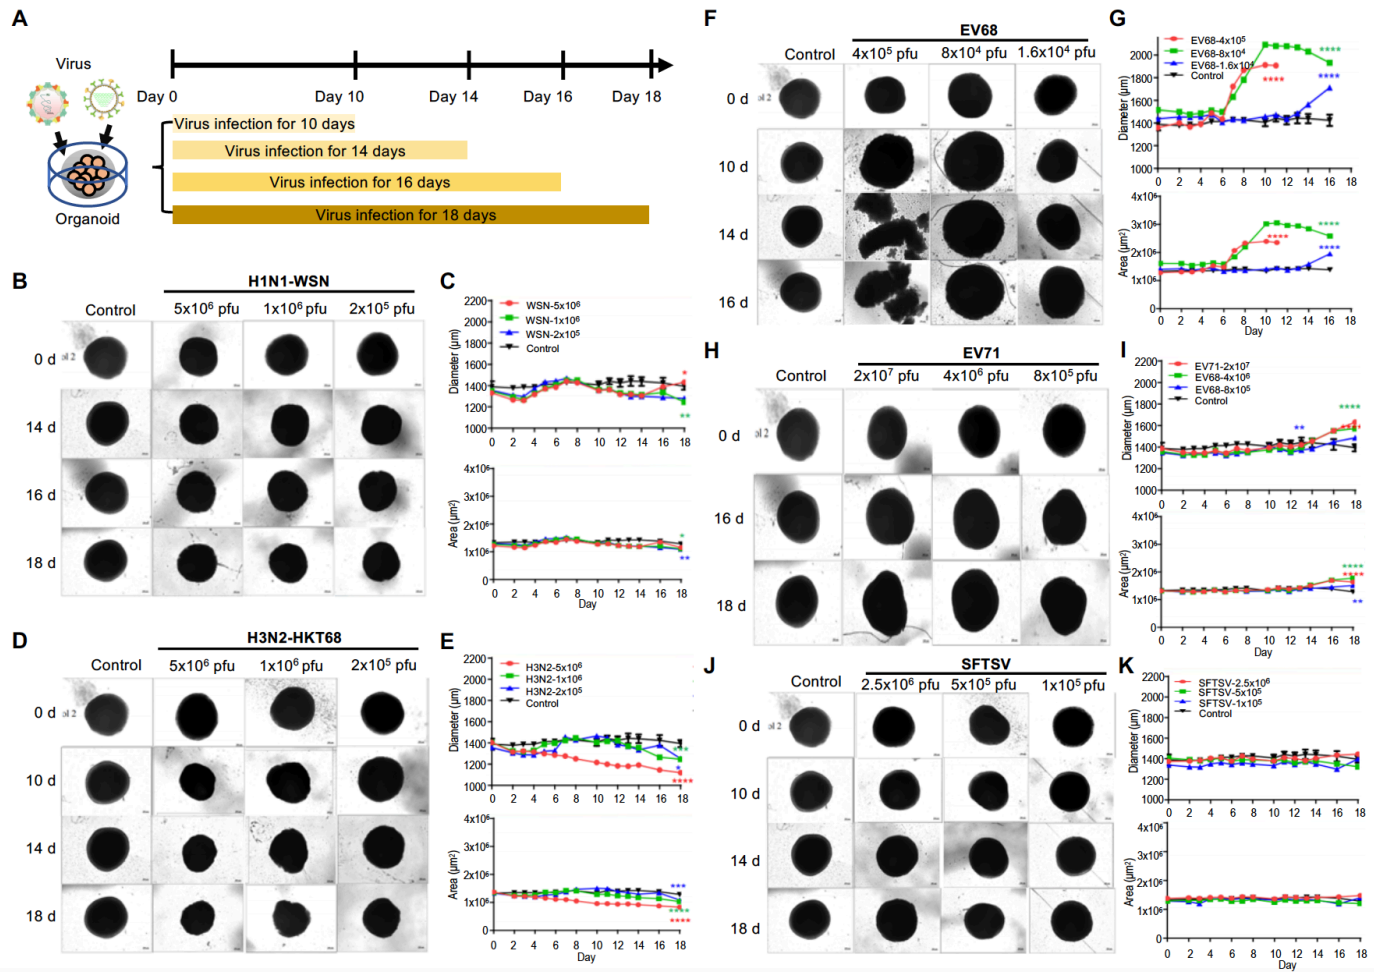

523

524 **Figure 2. Organoids as virus infection models.** (A) Schematic illustration of experimental design. Day 40

525 brain organoids were infected with viruses at indicated times. (B, D, F, H, J) Representative bright-field

526 images of day 40-brain organoids infected with viruses at indicated time points, including H1N1-WSN,

527 H3N2-HKT68, EV68, EV71, and SFTSV. The infected concentrations for H1N1-WSN were 5×10<sup>6</sup> pfu, 1×10<sup>6</sup>

528 pfu, and 2×10<sup>5</sup> pfu; for H3N2, they were 5×10<sup>6</sup> pfu, 1×10<sup>6</sup> pfu, and 2×10<sup>6</sup> pfu; for EV68, they were 4×10<sup>5</sup> pfu,

529 8×10<sup>4</sup> pfu, and 1.6×10<sup>4</sup> pfu; for EV71, they were 2×10<sup>7</sup> pfu, 4×10<sup>6</sup> pfu, and 8×10<sup>5</sup> pfu. Scale bars, 50 µm. (C,

530 E, G, I, K) Statistical analysis of area (µm<sup>2</sup>) and diameter (µm) of brain organoid infected with viruses at

531 indicated time points.

532

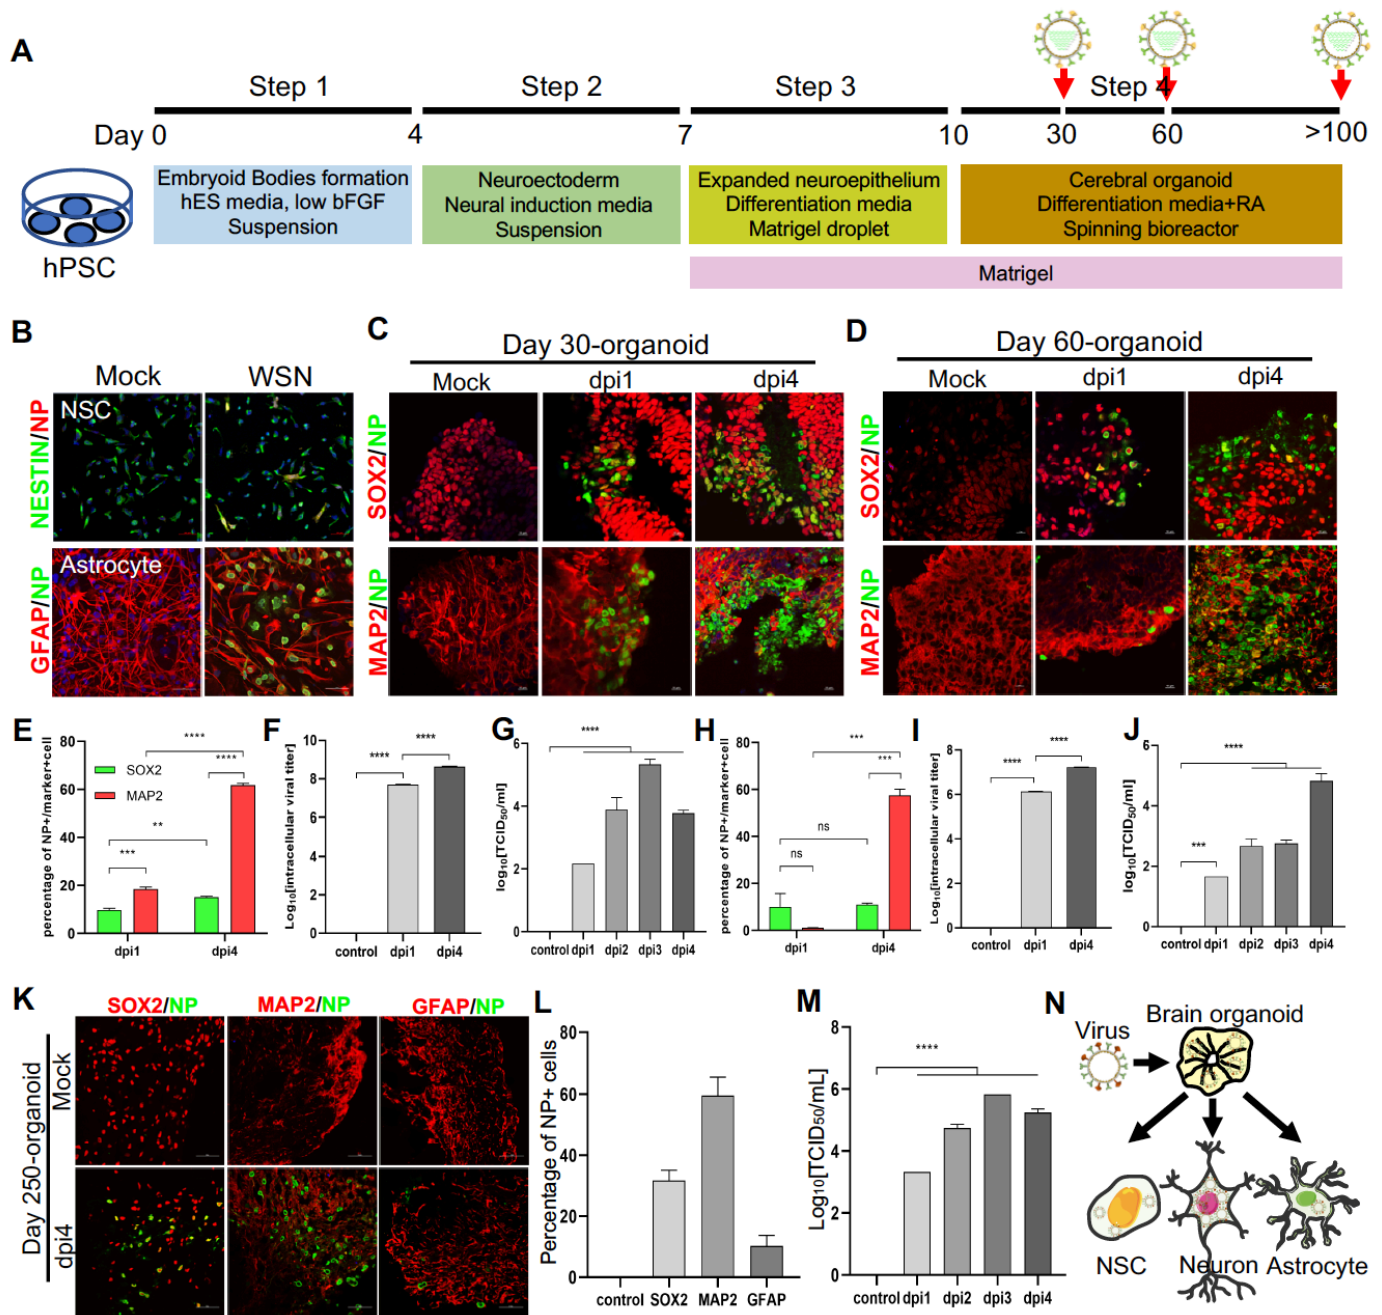

533

534 **Figure 3. Modeling influenza virus infection *in vitro* using brain organoids.** (A) Schematic illustration of

535 the experimental design of brain organoids infected with WSN at indicated time points. (B) Immunostaining

536 of neural stem cells and astrocytes infected with WSN. Scale bars, 50  $\mu$ m. (C, D) Immunostaining of neural

537 stem cells and neurons in day 30 and day 60 brain organoids infected with WSN for 1 day and 4 days. Scale

538 bars, 100  $\mu$ m. **(E, H)** The percentage of NP+ cells in infected day 30 and day 60 brain organoids. ~10% of  
539 SOX2+ NSCs and ~60% of MAP2+ neurons were infected with WSN. **(F, G, I, J)** The viral titers of  
540 intracellular and supernatants in day 30 and day 60 brain organoids. **(K)** Immunostaining of neural stem cells,  
541 neurons and astrocytes of day 250 brain organoids infected with WSN for 1 day and 4 days. Scale bars, 100  
542  $\mu$ m. **(L)** The percentage of NP+ cells in infected brain organoids. ~30% of SOX2+ NSCs, ~60% of MAP2+  
543 neurons and 10% astrocytes were infected with WSN. **(M)** The viral titers of supernatants on day 250 brain  
544 organoids. **(N)** Schematic illustration of WSN preferentially infected neurons in brain organoids.  
545

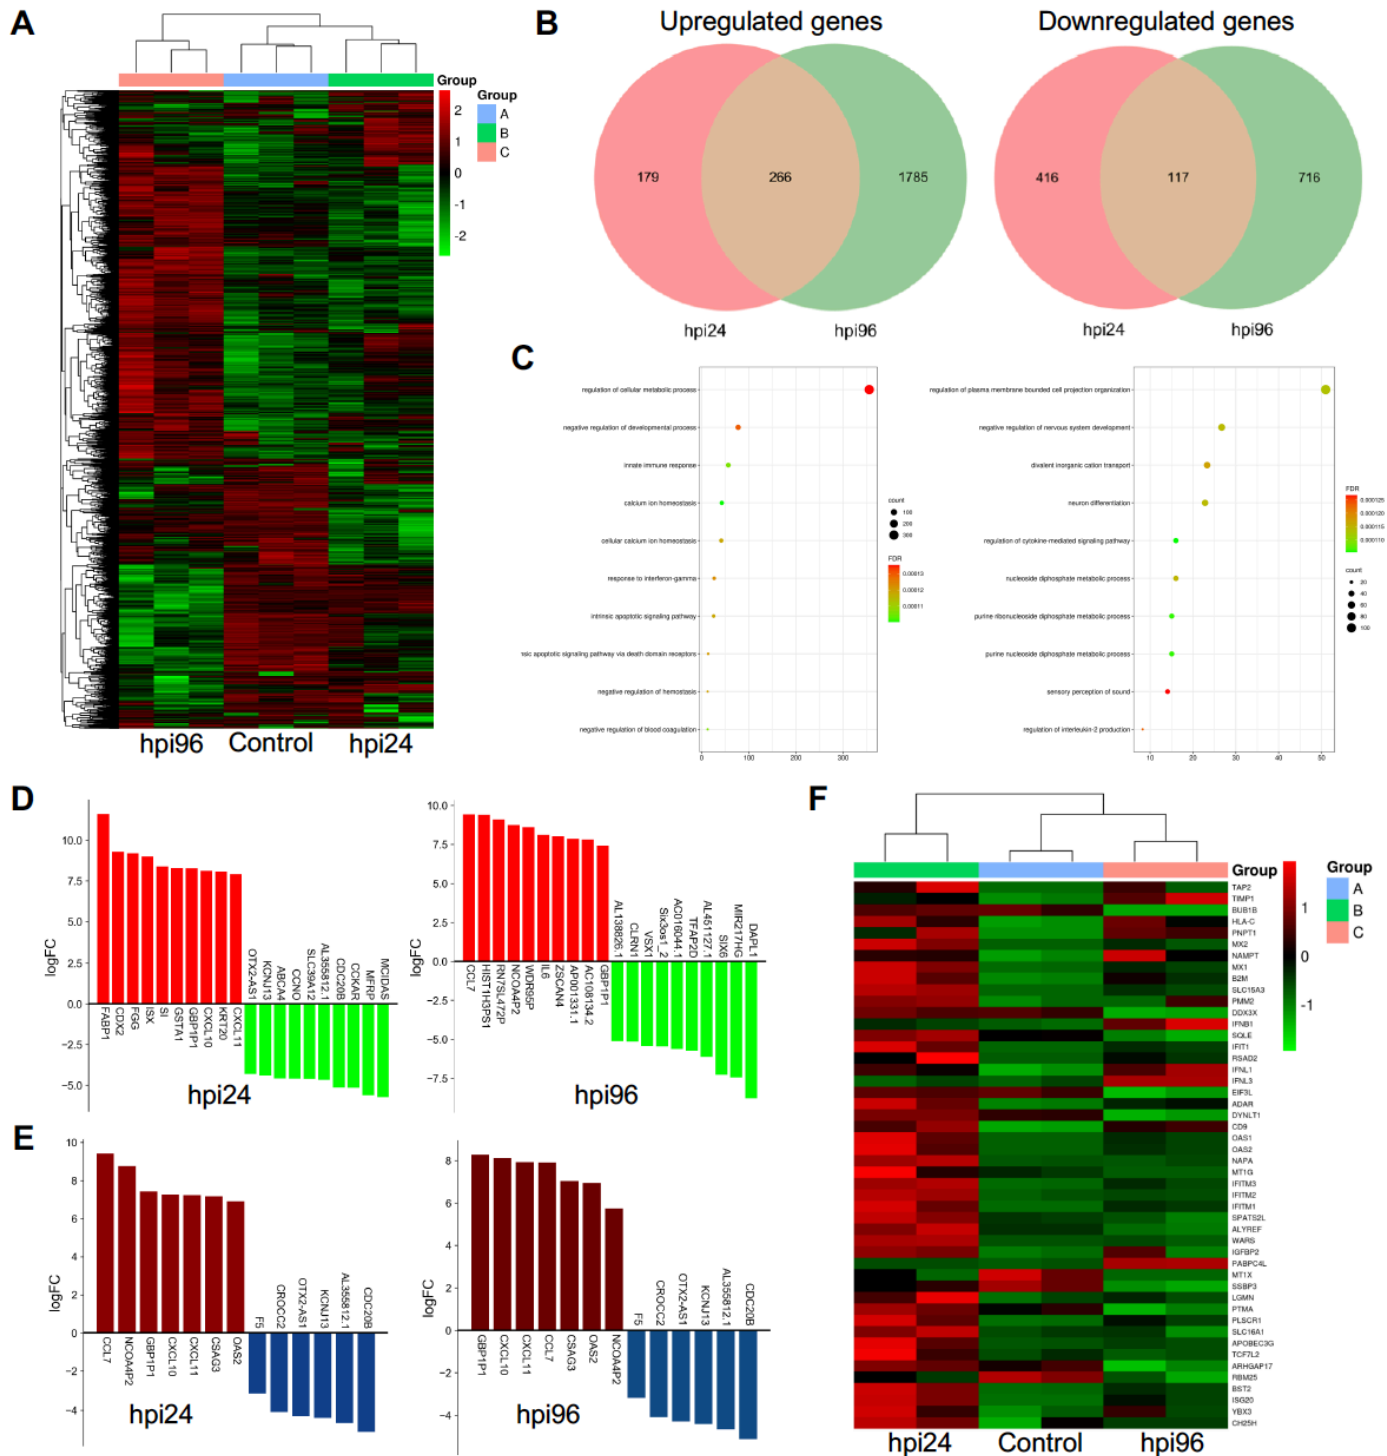

546

547 **Figure 4. RNA transcriptomic analysis of human brain organoids after WSN infection. (A) Hierarchical**

548 **clustering heatmap of differentially expressed genes derived from a comparison of a group of control, hpi 96,**

549 and hpi 24. **(B)** Venn diagram of upregulated and downregulated genes of brain organoids infected with WSN  
550 at 24 hpi and 96 hpi. **(C)** Top 10 enriched GO terms in brain organoids infected with WSN at 24 hpi and 96  
551 hpi. **(D)** Top 10 upregulated and downregulated genes at 24 hpi and 96 hpi after WSN infection. **(E)** The  
552 upregulated and downregulated genes at 24 hpi and 96 hpi after WSN infection. **(F)** Heatmap of interferon  
553 stimulating genes (ISGs).  
554

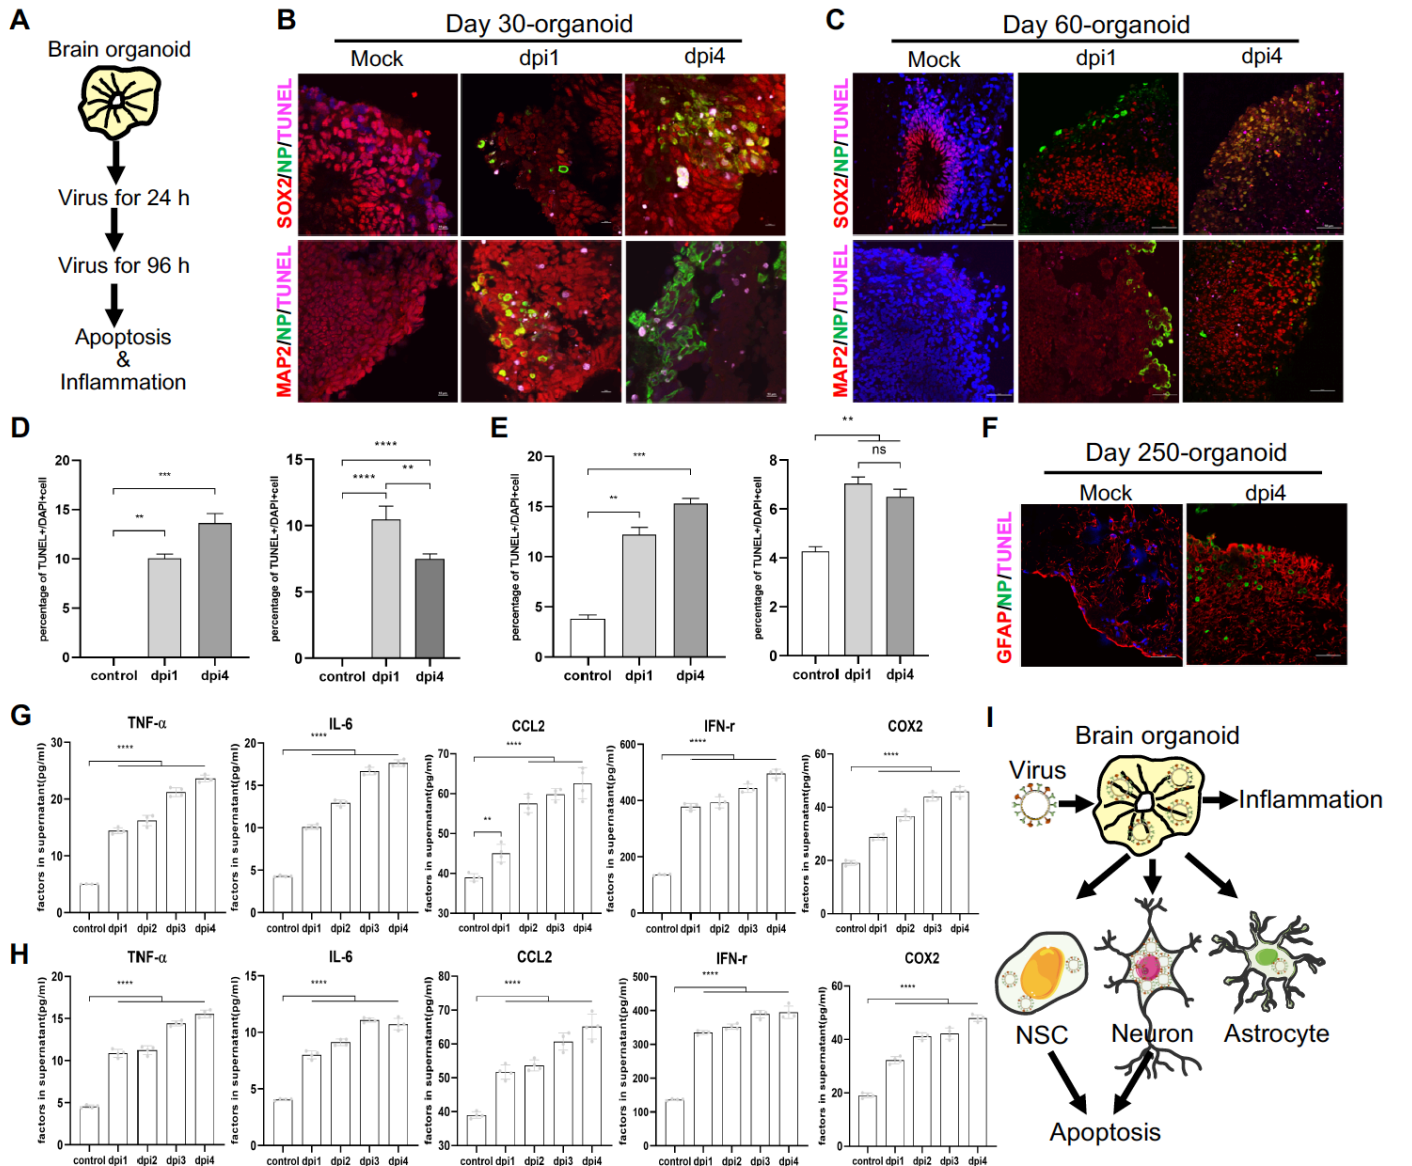

555

556 **Figure 5. WSN induced cell apoptosis and inflammation in human brain organoids. (A–D)** TUNEL

557 staining and quantification of positive cells in day-30 and day-60 brain organoids infected with WSN at 1 dpi

558 and 4 dpi show a time-dependent increase, respectively. Scale bars, 10  $\mu$ m. **(E)** TUNEL staining of GFAP+

559 astrocytes in day 250 brain organoids at 4 dpi. **(F, G)** Secreted inflammatory factors (e.g., TNF- $\alpha$ , IL-6, CCL2,

560 IFN- $\gamma$ , and COX2) in day-30 **(F)** and day-60 **(G)** brain organoids at indicated infection timepoints. Scale bars,

561 100  $\mu$ m.

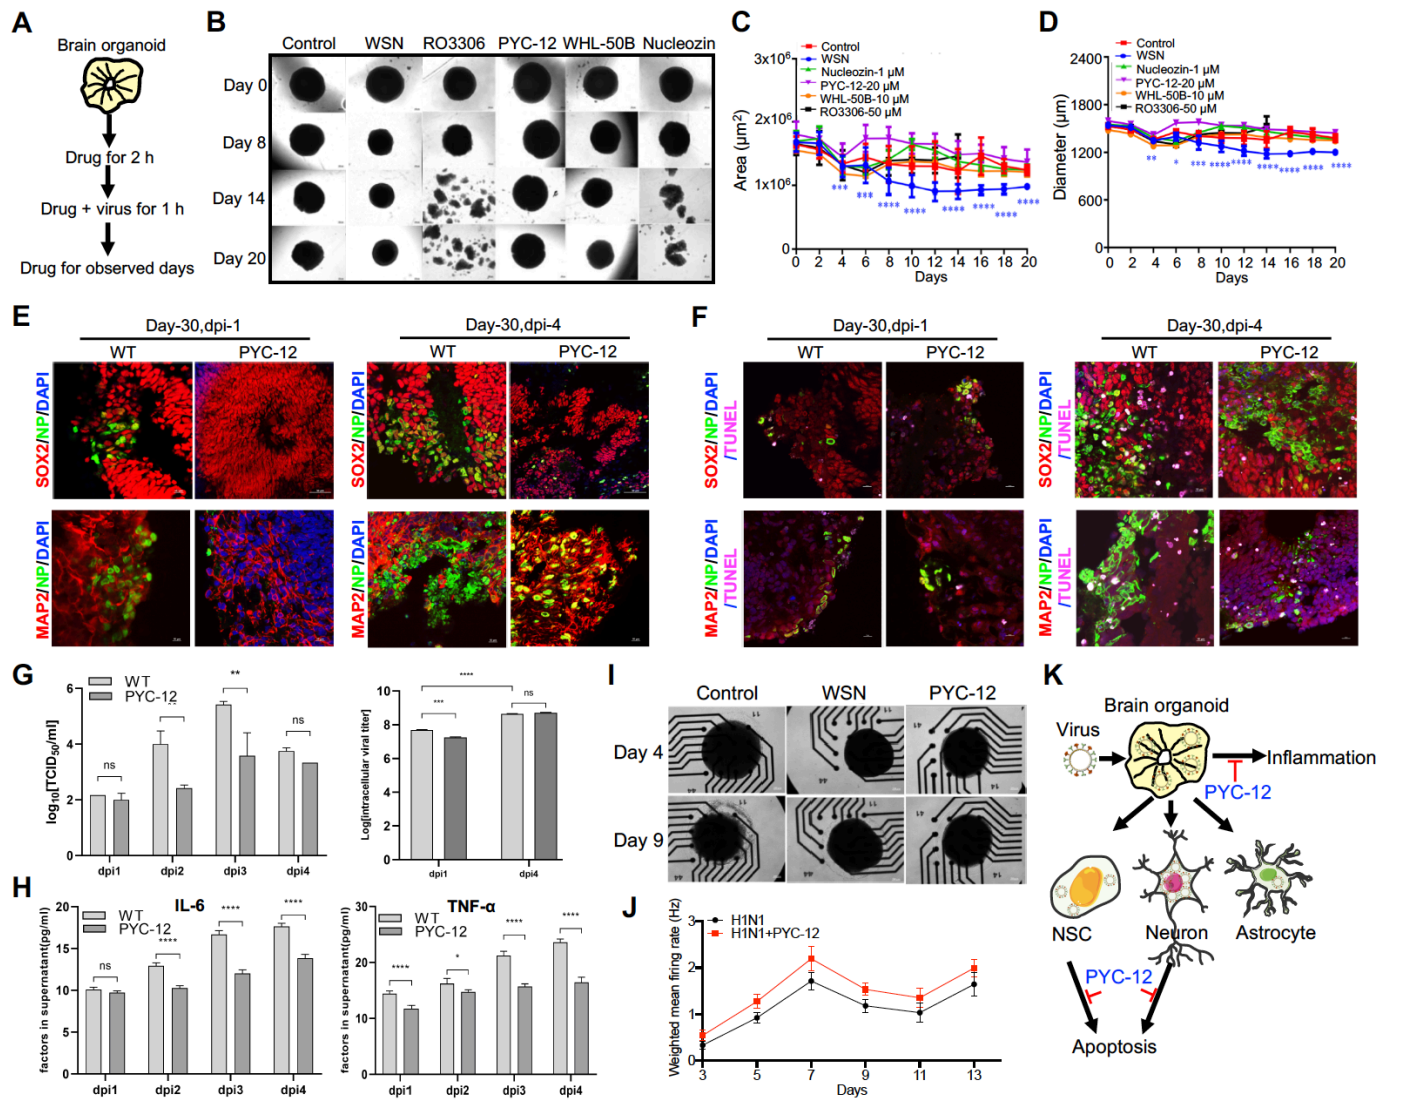

562

563 **Figure 6. Antiviral drug study of human brain organoids infected with influenza virus.** (A) Schematic of  
564 the workflow for drug screening. (B) Representative bright field images of organoids cotreated with  
565 H1N1-WSN and several drugs at indicated time points. Nucleozin was used as a positive control. Scale bars,  
566 50  $\mu\text{m}$ . (C, D) Statistical analysis of area ( $\mu\text{m}^2$ ) and diameter ( $\mu\text{m}$ ) of brain organoids infected with  
567 H1N1-WSN at indicated time points. (E) Immunostaining of neural stem cells and neurons in day 30 brain  
568 organoids co-treated with WSN and PYC-12 for 1 day and 4 days. Scale bars, 10  $\mu\text{m}$  and 50  $\mu\text{m}$ . (F) TUNEL

569 staining of neural stem cells and neurons in day 30 brain organoids co-treated with WSN and PYC-12 for 1  
570 day and 4 days. Scale bars, 10  $\mu\text{m}$ . **(G)** The viral titers of intracellular and supernatants from day 30 brain  
571 organoids co-treated with WSN and PYC-12. **(H)** The inflammatory factors release (IL-6 and TNF- $\alpha$ ) of  
572 day-30 brain organoids co-treated with WSN and PYC-12 at indicated infection timepoints. **(I)** The  
573 representative bright field images of microelectrode array (MEA) analysis of PYC-12 treated brain organoids.  
574 Scale bars, 50  $\mu\text{m}$ . **(J)** Weighted mean firing rates (Hz) of brain organoids treated with H1N1 or cotreated with  
575 H1N1 and PYC-12 at indicated time points. **(K)** Schematic illustration of the antiviral strategy of PYC-12  
576 through anti-apoptosis and anti-inflammation.  
577



578 **Supporting information**

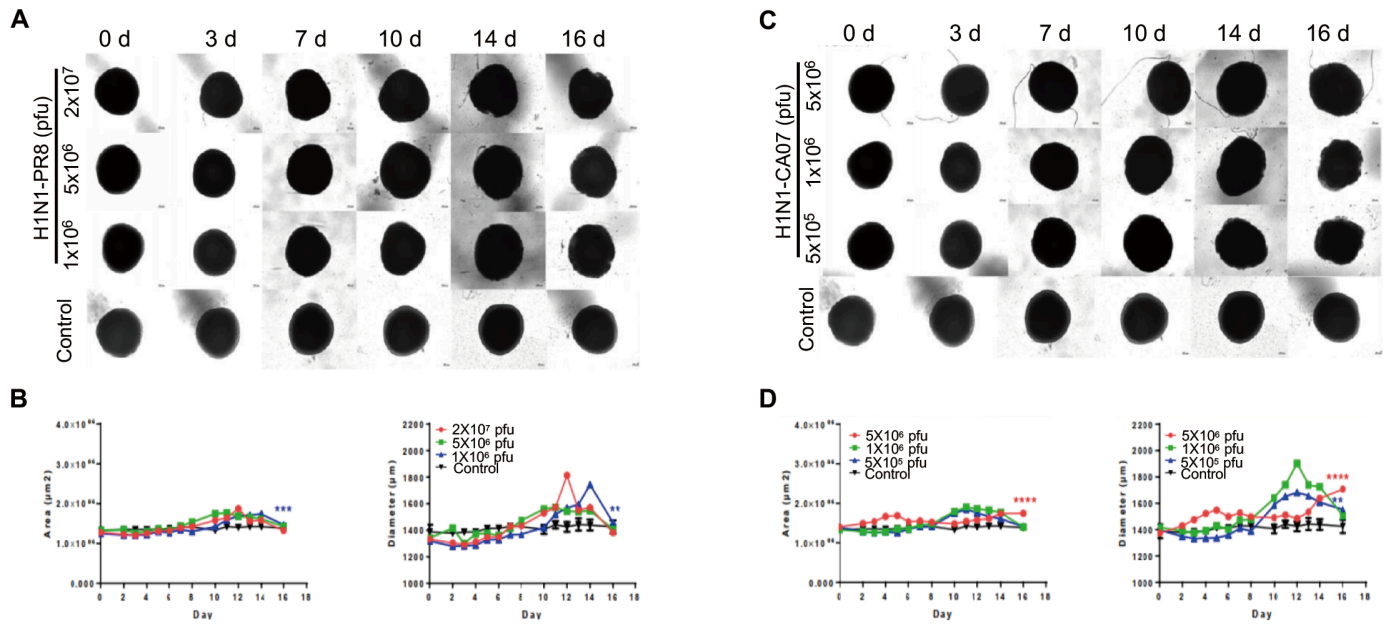

579

580 **Figure S1.** (A, C) Representative bright-field images of day 40-brain organoids infected with H1N1-PR8 or  
581 H1N1-CA07 at indicated time points. The infected concentrations for H1N1-PR8 were  $1 \times 10^6$  pfu,  $5 \times 10^6$  pfu,  
582 and  $2 \times 10^7$  pfu; for H1N1-CA07, they were  $5 \times 10^5$  pfu,  $1 \times 10^6$  pfu, and  $5 \times 10^6$  pfu. Scale bars,  $50 \mu\text{m}$ . (B, D)  
583 Statistical analysis of area ( $\mu\text{m}^2$ ) and diameter ( $\mu\text{m}$ ) of brain organoids infected with viruses at indicated time  
584 points.

585

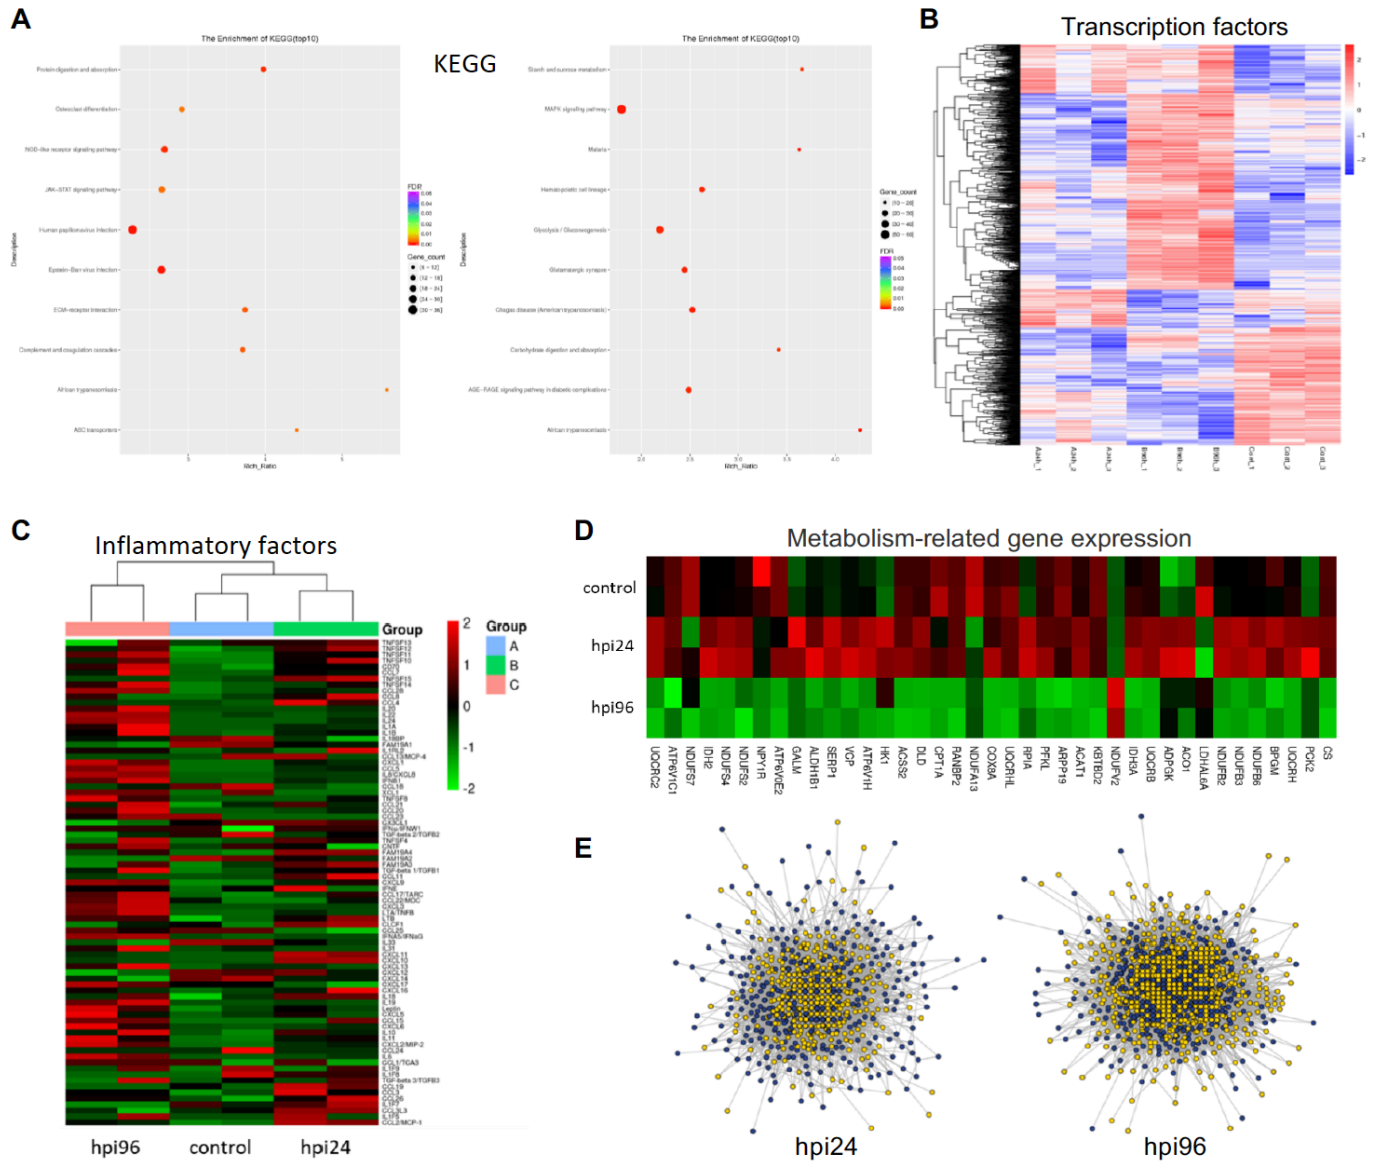

586

587 **Figure S2.** (A) The top 10 KEGG pathway enrichments of of brain organoids infected with WSN at 1 dpi and  
 588 4 dpi. (B) Heatmap of transcription factor expression in control, hpi24, and hpi96 groups. (C) Heatmap of

589 inflammatory factor expression in control, hpi24, and hpi96 groups. (D) Heatmap of metabolic genes. (E)

590 Protein-protein interaction network of WSN infected brain organoids at 24 hpi and 94 hpi.

591

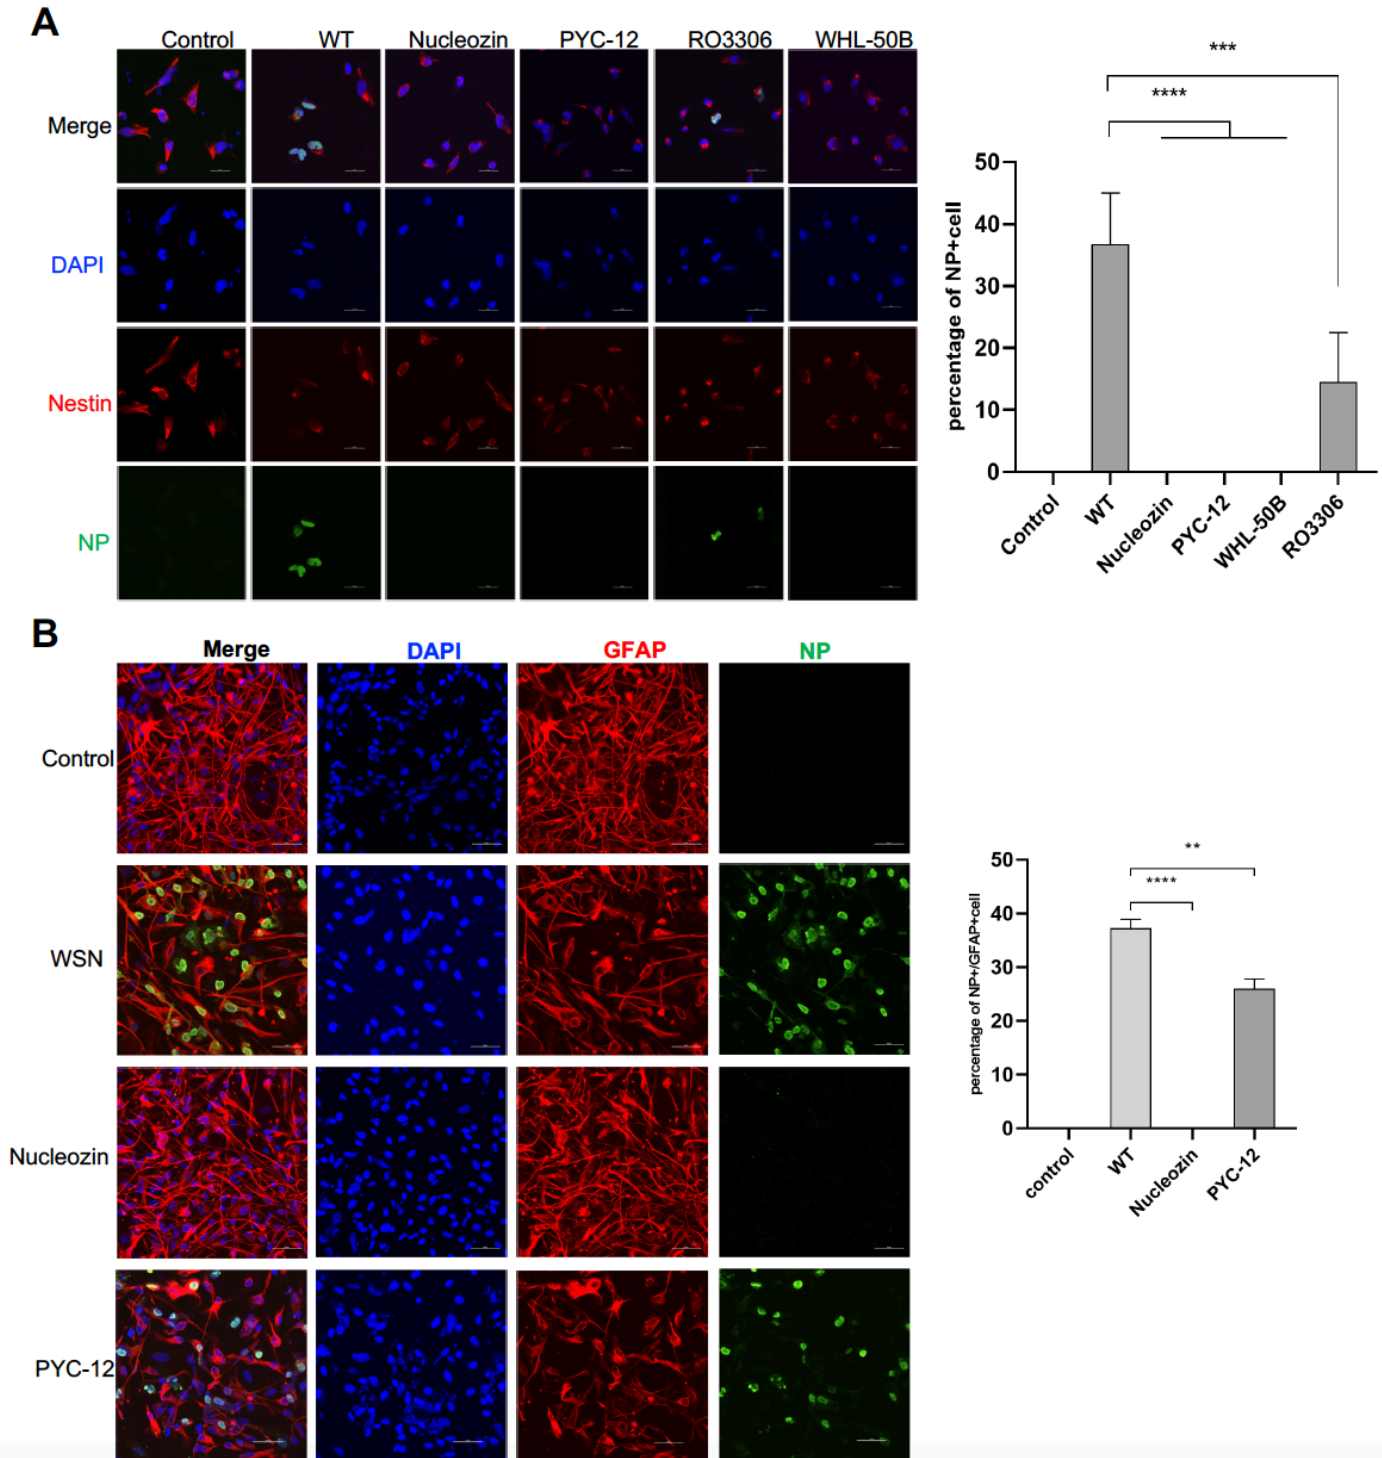

592

593 **Figure S3. Antiviral drug screening using NSCs and astrocytes.** (A) Immunostaining and statistical

594 analysis of neural stem cells treated with WSN, Nucleozin, PYC-12, RO3306, and WHL-50B. Non-treated

595 NSCs were used as a negative control. Scale bars, 20  $\mu\text{m}$ . **(B)** Immunostaining and statistical analysis of

596 astrocytes treated with WSN, nucleozin, and PYC-12. Non-treated astrocytes were used as a negative control.

597 Scale bars, 50  $\mu\text{m}$ .

598

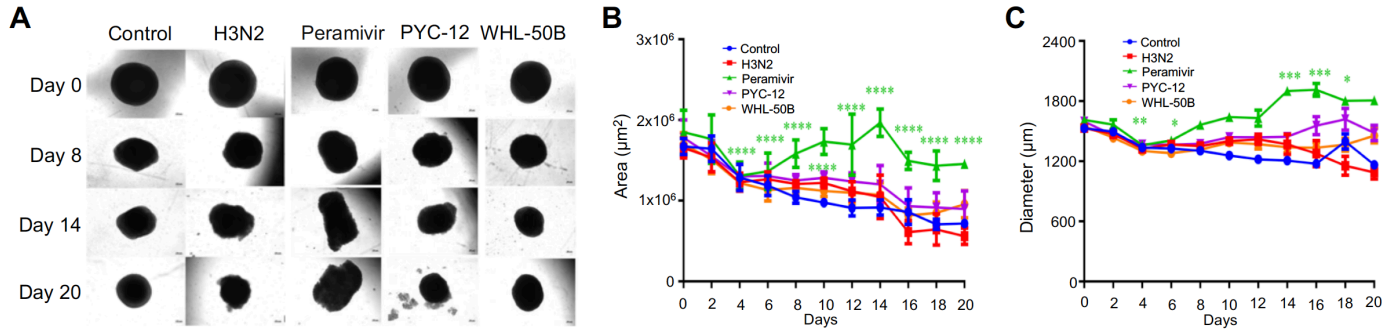

599

500 **Figure S4. Antiviral drug study of human brain organoids infected with H3N2-HKT68. (A)**

501 Phase-contrast images of brain organoids cotreated with H3N2-HKT68, peramivir, PYC-12, and WHL-50B at

502 indicated time points. Scale bars, 50 µm. (B, C) Statistical analysis of the area (µm<sup>2</sup>) and diameter (µm) of

503 organoids cotreated with H3N2-HKT68 and different drugs at indicated time points.

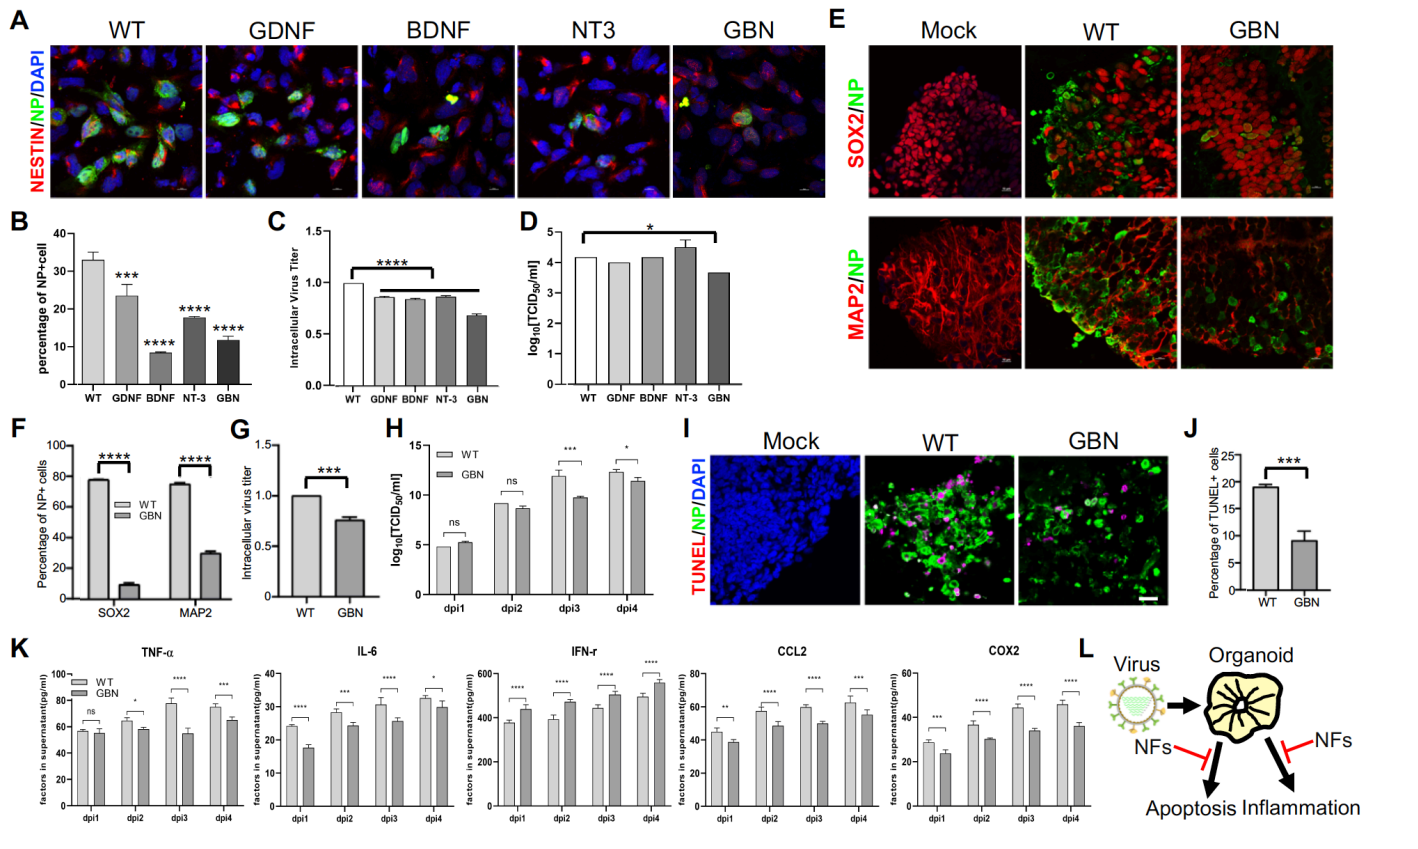

504

505

506

507

508

509

510

511

512

513

514

**Figure S5. Neurotrophic factors inhibits WSN infection.** (A) Immunostaining of NSCs treated with WSN or different neurotrophic factors, including BDNF, GDNF and NT3. GBN denotes the combination of these three neurotrophic factors. Scale bar, 10 μm. (B) The percentage of NP+ cells after treatment. (C, D) Intracellular (left) and extracellular (right) virus titers after treatment. (E) Immunostaining of day 30 brain organoids treated with WSN and GBN. Scale bar, 10 μm. (F) The percentage of NP+ cells after GBN treatment compared to WSN infection. (G, H) The intracellular and extracellular virus titers after treatment. (I, J) TUNEL staining and quantification of positive cells in day 30 brain organoids at 4 dpi. Scale bar, 50 μm. (K) The secreted inflammatory factors (e.g., TNF-α, IL-6, CCL2, IFN-γ, and COX2) from day 30 brain organoids at indicated infection timepoints. (L) Schematic illustration of antiviral methods produced through neurotrophic factors treatment.

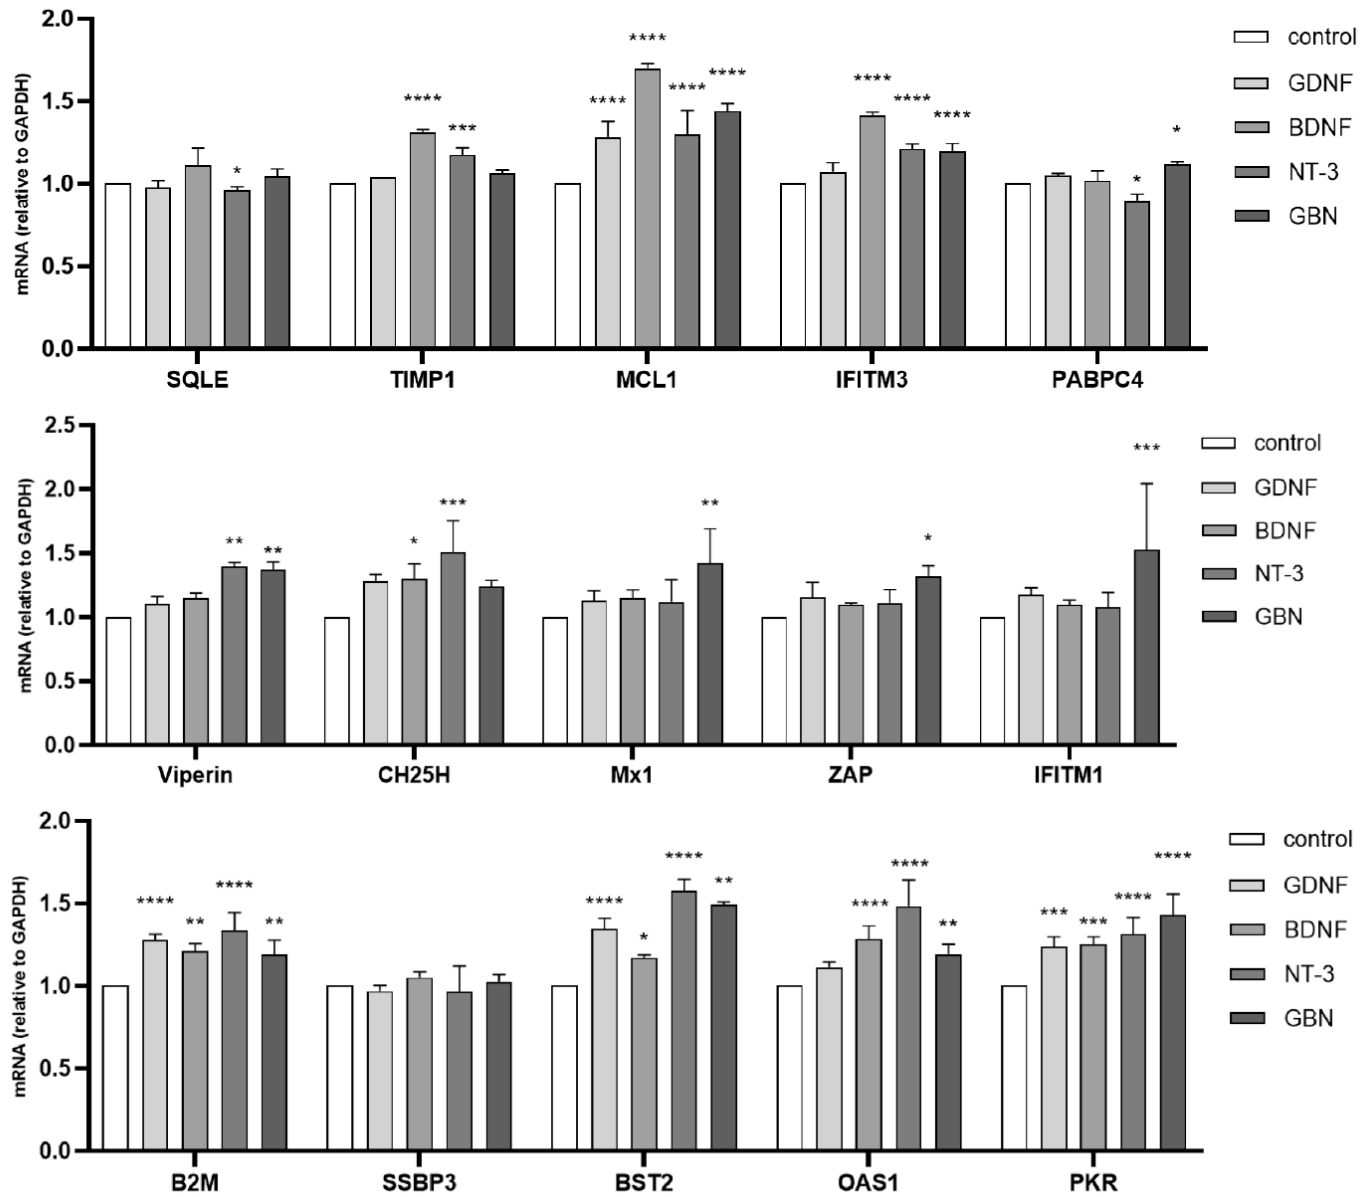

515

516 **Figure S6.** Insulin stimulating gene expression from organoids cotreated with WSN and neurotrophic factors

517 by quantitative RT-PCR.
